# Supplementary material for: Densified multi-mission observations by developed optical water levels show marked increases in lake water storage and overflow floods on the Tibetan Plateau
Source: Copernicus journal article supplement (doi:10.5194/essd-2019-34), 2019-03-15
Supplement: Supplementary file [file essd-2019-34-AC4-supplement.zip]

# Generation of long-term and high-temporal-resolution water level and storage data sets for lakes on the Tibetan Plateau using multiple altimetric missions and Landsat-derived lake shore positions and areas

## ~~Densified multi-mission observations by developed optical water levels show marked increases in lake water storage and overflow floods on the Tibetan Plateau~~

Xingdong Li<sup>1</sup>, Di Long<sup>1</sup>, Qi Huang<sup>1</sup>, Pengfei Han<sup>1</sup>, Fanyu Zhao<sup>1</sup>, Yoshihide Wada<sup>2</sup>

<sup>1</sup> State Key Laboratory of Hydrosience and Engineering, Department of Hydraulic Engineering, Tsinghua University, Beijing, 100084, China

<sup>2</sup> Institute for Applied Systems Analysis (IIASA), Laxenburg, A-2361, Austria

Correspondence to: Di Long (dlong@tsinghua.edu.cn)

**Abstract.** The Tibetan Plateau (TP) known as Asia's water towers is quite sensitive to climate change, reflected by changes in hydrological state variables such as lake water storage. Given the extremely limited ground observations on the TP due to the harsh environment and complex terrain, we exploited multisource remote sensing, i.e., multiple altimetric missions and Landsat archives to create dense time series with monthly to weekly temporal resolution (~~monthly and even higher such as 10 days on average~~) of lake water level and storage changes across 52 large lakes (>100 km<sup>2</sup>) on the TP during 2000–2017 (the data set is available online with a DOI: <https://doi.org/10.1594/PANGAEA.898411>). ~~Field experiments were carried out in two typical lakes to validate the remotely sensed results.~~ With Landsat archives and ~~partial~~ altimetry data, we developed ~~optical~~ water levels from lake shoreline changes (namely optical water levels) that cover the study period ~~most of TP lakes~~ and serve as an ideal reference for merging multisource lake water levels with systematic biases. To validate the optical water levels, field experiments were carried out in two typical lakes, while theoretical analysis was performed based on high-resolution optical images (0.8 m) as well. The RMSE of optical water levels ~~show an uncertainty of is ~0.11 m compared with in situ measurements, which is consistent with theoretical analysis.~~ ~~that~~ The accuracy of optical water levels is comparable with most altimetry data and prevails in relatively small lakes. ~~largely reduce the lack of dense altimetric observations with systematic errors well removed for most of lakes.~~ The ~~merged dense~~ densified lake water levels (optical and altimetric water levels) ~~provided~~ can provide critical and accurate information on the long-term and short-term monitoring of lake water level and storage changes on the TP. ~~We found that the total storage of the 52 lakes increased by 97.3 km<sup>3</sup> at two stages, i.e., 6.68 km<sup>3</sup>/yr during 2000–2012 and 2.85 km<sup>3</sup>/yr during 2012–2017. The total overflow from Lake Kusai to Lake Haidingnuoer and Lake Salt during Nov 9–Dec 31 in 2011 was estimated to be 0.22 km<sup>3</sup>, providing~~ as well as critical information on lake overflow

flood monitoring and prediction as the expansion of some TP lakes becomes a serious threat to surrounding residents and infrastructure.

## 1 Introduction

The Tibetan Plateau (TP), providing vital water resources for more than a billion population in Asia, is a sensitive region undergoing rapid climate change (Field et al., 2014). There are more than 1,200 alpine lakes larger than 1 km<sup>2</sup> (Zhang et al., 2017a) on the TP where glaciers and permafrost are also widely distributed. With little disturbance by human activity in this area, lake storage changes may serve as an important indicator that reflects changes in regional hydrological processes and responses to climate change. Wang et al. (2018) showed that global endorheic basins are experiencing a decline in water storage whereas the endorheic basin on the TP is an exception. Given the fact that TP lakes have been expanding for more than 20 years (Pekel et al., 2016), a high quality data set on lake water level or storage would be the basis for investigating its cause (climate change or variation) and interaction with the water/energy cycles and human society (increasing risks of inundation and overflow floods). ~~pasture, farmland, and infrastructure near the lake shore face the risk of inundation.~~ Therefore, it is imperative to largely improve the monitoring of TP lakes.

As an important component of the hydrosphere, terrestrial water cycle, and global water balance, millions of inland water bodies such as lakes, wetlands, and human reservoirs have been investigated globally and their total storage was estimated to be  $181.9 \times 10^3 \text{ km}^3$  based on statistical models (Lehner and Döll, 2004; Messenger et al., 2016; Pekel et al., 2016). Lake storage changes, which is more concerned in the regional water balance, can be derived from remotely observ~~ed~~sensed changes in lake water level and area (Frappart et al., 2005). ~~M~~Most of these two kinds of observations in related studies were obtained from satellite remote sensing due to the scarcity of in situ data across the TP where the harsh environment and complex terrain make in situ measurement costly and risky (Crétaux et al., 2016; Song et al., 2013; Yao et al., 2018b; Zhang et al., 2017a). Changes in lake water level can be monitored using satellite altimeters ~~ers ry with a radar or laser~~ initially designed for sea surface topography~~sea surface height~~ or ice ~~bergsheet~~sea ice freeboard height measurements. Altimeters determine the range between the nadir point and satellite by analysing the waveforms of reflected electromagnetic pulse. There are two main categories of satellite altimeters (i.e., laser and radar). Laser altimeters, e.g., ICESat, operating in near infrared wave length has a smaller size of footprints and generally higher accuracy than radar altimeters, facilitating applications in glacier/ice mass balance studies (Neckel et al., 2014; Sandberg Sørensen et al., 2011). Rader altimeters, operating in microwave band, The waveforms of radar or laser pulse may, however have larger footprints, and are more likely to be contaminated by signals from complex terrain when applied to inland water bodies. ~~Nevertheless, but~~ it is possible to remove these impacts with waveform retracking algorithms (Guo et al., 2009; Huang et al., 2018; Jiang et al., 2017). Zhang et al. (2011) mapped water level changes in 111 TP lakes for the period 2003–2009 using ~~ICESat~~ICESat data that have a temporal resolution of 91 days. ~~ICESat~~ICESat data have relatively denser ground tracks but a lower temporal resolution than most of other altimetric missions. This means that ~~ICESat~~ICESat covers more lakes but provide few water level observations for each lake. After ~~ICESat~~ICESat was

decommissioned in 2010, CryoSat-2 data ~~starteding frompanning the period~~ 2010–2015 were adopted in related studies (Jiang et al., 2017), due to its similar dense ground tracks and competitive precision as ~~ICESat+ICESat~~. Other altimetric missions, such as TOPEX, Jason-1/2/3, ERS-1/2, and ~~ENVISAT~~Envisat also have some but relatively limited applications in monitoring changes in lake water level on the TP due to sparse ground tracks. In this study, multisource altimetry data (i.e., Jason-1/2, 5 ~~ENVISAT~~Envisat, ~~ICESat+ICESat~~, and CryoSat-2) were combined if available for the study lakes, with the optical water levels developed in this study as a critical reference to densify the altimetric observations and merging data from multiple altimetric missions.

Changes in lake area can be captured by optical/SAR images from medium or high spatial resolution remote sensing data, such as Landsat TM/ETM<sup>+</sup>/OLI. Extraction of lake water bodies can be manually (Wan et al., 2016) or automatically (Zhang et al., 10 2017b) achieved. Automatic water extraction methods based on the water index and auto-thresholding are more efficient in dealing with a large amount of remote sensing images. Even so, acquisition and preprocessing of such a large amount of historical images (~10TB) covering TP lakes are still intractable for researchers with limited computation resources. With the help of cloud-based platforms, such as the Google Earth Engine (GEE) that significantly reduces data downloading and preprocessing time, tens of thousands of images may be processed online in days instead of months (Gorelick et al., 2017). In 15 this study, more than twenty thousand Landsat TM/ETM/OLI images were processed online using GEE to extract lake water bodies based on the water index (McFeeters, 1996) and Otsu algorithm (Otsu, 1979).

There are some studies focusing on changes in lake storage on the TP over recent decades, e.g., Zhang et al. (2017a) examined changes in lake storage for ~70 lakes from the 1970s to 2015 with ~~ICESat+ICESat~~ altimetry data and Landsat archives. An individual lake area data set from the 1970s and annual area data after 1989 were used. Due to the short time span of ~~ICESat+~~ 20 ~~ICESat~~, they used the hypsometric method to convert lake areas into water levels. Yao et al. (2018b) used DEMs and optical images to develop hypsometric curves for lakes on the central TP, and estimated annual changes in lake storage from 2002 to 2015 for 871 lakes. These studies have a wide spatial coverage of lakes but relatively lower temporal sampling and little altimetric information, which may limit the accuracy of trends in lake water level/storage in some cases and short-term monitoring of lake overflow flood. The LEGOS Hydroweb provides a lake data set, including multisource altimetry-based 25 changes in lake water level and storage as well as hypsometric curves for 22 TP lakes (Crétaux et al., 2016; Crétaux et al., 2011b). The data set incorporated more altimetric information and provided data of higher temporal resolution. However, there may be a remaining bias when different sources of altimetric data were merged, due to the lack of some important reference that can be derived from optical remote sensing images to be shown in this study. We term the reference data as the 'optical water level' to be introduced in section 3.2. Here, we list recent studies and data sets (Table 1) to provide a concise summary 30 on the progress of remote sensing-based water level and storage monitoring on TP lakes.

**Table 1. Recent studies and data sets on TP lakes. H, A, V in the table denote lake water level, area, and volume, respectively.**

| <i>Reference</i>                      | <i>No. of study lakes</i> | <i>Data type</i>               | <i>Time span</i>                                                                           | <i>Temporal resolution</i>                                                          | <i>Source data</i>                                                                                                                                                                                                           |
|---------------------------------------|---------------------------|--------------------------------|--------------------------------------------------------------------------------------------|-------------------------------------------------------------------------------------|------------------------------------------------------------------------------------------------------------------------------------------------------------------------------------------------------------------------------|
| <i>(Song et al., 2013)</i>            | 30                        | H, A, V, and hypsometric curve | 4 records for 1970s, 1990, 2000 and 2011                                                   | Decadal                                                                             | Altimetry data:<br><del>ICESat</del> - <a href="#">ICESat</a><br>Optical data:<br>Landsat TM/ETM <sup>+</sup>                                                                                                                |
| <i>(Crétaux et al., 2016)</i>         | 22                        | H, A, V, and hypsometric curve | 1995–2015<br>Relative bias partially removed (only for altimeters with overlapping period) | Sub-monthly for lakes with T/P, and Jason-1/2 data, and ~monthly for the rest lakes | Altimetry data:<br>T/P, ERS-2, GFO, <del>Envisat</del> <a href="#">Envisat</a> , Jason-1/2, SARAL, <del>ICESat</del> - <a href="#">ICESat</a> , and CryoSat-2<br>Optical data:<br>Landsat TM/ETM <sup>+</sup> /OLI and MODIS |
| <del><i>(Wan et al., 2016)</i></del>  | <del>&gt;1000</del>       | <del>A</del>                   | <del>3 records for 1960s, 2005, and 2014</del>                                             | <del>Decadal</del>                                                                  | <del>Optical data:<br/>Landsat ETM<sup>+</sup>/OLI, CBERS-1 CCD, and GF-1 WFV</del>                                                                                                                                          |
| <i>(Jiang et al., 2017)</i>           | 70                        | H                              | 2003–2015<br>Relative bias between ICESat and CryoSat-2 unremoved                          | ~Monthly                                                                            | Altimetry data:<br><del>ICESat</del> - <a href="#">ICESat</a> , and CryoSat-2                                                                                                                                                |
| <del><i>(Yang et al., 2017)</i></del> | <del>874</del>            | <del>A</del>                   | <del>2009–2014</del>                                                                       | <del>Monthly data for 24 largest lakes, and yearly data for the rest lakes</del>    | <del>Optical data:<br/>Landsat TM/ETM<sup>+</sup>/OLI and HJ-1A/1B</del>                                                                                                                                                     |
| <i>(Zhang et al., 2017a)</i>          | 60~70                     | H, A, V, and hypsometric curve | One record for 1970s, and annual data for 1989–2015                                        | Annual                                                                              | Altimetry data:<br><del>ICESat</del> - <a href="#">ICESat</a><br>Optical data:<br>Landsat TM/ETM <sup>+</sup> /OLI                                                                                                           |
| <i>(Li et al., 2017b)</i>             | 167                       | H                              | 2002–2012                                                                                  | ~Monthly                                                                            | Altimetry data:<br><del>ICESat</del> - <a href="#">ICESat</a> and <del>Envisat</del> <a href="#">Envisat</a>                                                                                                                 |
| <i>(Yao et al., 2018b)</i>            | 871                       | H, A, V, and hypsometric curve | 2002–2015                                                                                  | Annual                                                                              | Optical data:<br>Landsat TM/ETM <sup>+</sup> /OLI and HJ-1A/1B<br>DEM data:<br>SRTM and ASTER                                                                                                                                |
| <i>(Hwang et al., 2019)</i>           | 59                        | H                              | 2003–2016<br>Relative bias partially removed (only for lakes with Jason data/in situ data) | Sub-monthly for lakes with Jason-2 data, and ~monthly for the rest lakes            | Altimetry data: Jason-2/3, SARAL, <del>ICESat</del> - <a href="#">ICESat</a> , and CryoSat-2<br>(Jason-3 data for validation)                                                                                                |
| <i>Our study</i>                      | 52                        | H, A, V, and hypsometric curve | 2000–2017<br>All relative biases removed                                                   | Sub-monthly for most lakes                                                          | Altimetry data: Jason-1/2/3, <del>Envisat</del> <a href="#">Envisat</a> , <del>ICESat</del> - <a href="#">ICESat</a> , and CryoSat-2<br>Optical data:<br>Landsat TM/ETM <sup>+</sup> /OLI                                    |

The overall objective of this study was to examine long-term and short-term changes in water level and storage across 52 lakes with surface areas larger than 150 km<sup>2</sup> on the TP by merging multisource altimetry and optical remote sensing images to generate a much denser (monthly or higher such as 10 days on average), more coherent lake water level/storage change data set covering the period 2000–2017 and the hypsometric curve ([the lake area-water level relationship](#)) for each study lake.

~~Results of this study provide a comprehensive and detailed assessment of changes in lake level and storage on the TP for the recent two decades, and short-term monitoring of lake overflow flood for some lakes. This study could largely benefit more detailed investigations into lakes, lake basins, and regional climate change, because the generated data set has the highest temporal resolution during the study period. To ensure data quality, field experiments were carried out and in situ data were collected to examine the uncertainty in the derived optical water levels.~~ [To investigate changes in lake storage, changes in lake water level and lake area need to be derived from multisource remote sensing. First, water levels from various satellite altimeters \(see-\) for each lake as well as changes in lake shoreline and area from optical remote sensing images \(i.e., Landsat TM/ETM<sup>+</sup>/OLI\) were derived. Second, the systematic biases between different altimetry data were removed by either comparing the mean water level of the overlap period \(see Figure 1\) or comparing the two water level time series with changes in lake shoreline, depending on the length of the overlap period \(details can be found in section 3.1\). The lake shoreline changes, termed as the optical water levels against altimetry water levels in this study, can serve as a unique source of information reflecting water level changes as well as a data merging reference. We will show that after deriving two or three regression parameters, lake shoreline changes can well represent lake water levels with comparable accuracy as altimetry-derived water levels. Third, with information on changes in water level and water area derived from altimetry data and optical remote sensing images, the hypsometric curve that describes the relationship between the lake water level and lake water storage changes can be derived. Fourth, the integral of the hypsometric curve was performed to convert water level time series into lake storage change time series.](#)

~~Results of this study provide a comprehensive and detailed assessment of changes in lake level and storage on the TP for the recent two decades, and short-term monitoring of lake overflow flood for some lakes. This study could largely benefit more detailed investigations into lakes, lake basins, and regional climate change, because the generated data set has the highest temporal resolution during the study period~~ [with systematic biases well removed. To ensure data quality, field experiments were carried out and in situ data were collected to examine the uncertainty in the derived optical water levels. Details will be illustrated in the following sections.](#)

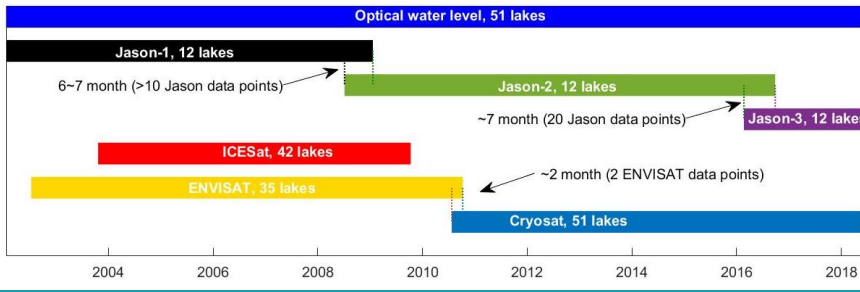

**Figure 1. Spatial (the number of lakes covered) and temporal coverage and their overlap periods of multiple satellite altimetry missions used in this study, including Jason-1/2/3, Envisat, ICESat, and CryoSat-2.**

## 5 2 Study area and data

### 2.1 Study area

The TP can be generally divided into 12 major basins, among which the Inner/Central TP (CP) is the only endorheic basin and home to most TP lakes including ~300 TP lakes larger than 10 km<sup>2</sup>. Therefore, it was chosen as the main study area. The endorheic basin covers an area of ~710,000 km<sup>2</sup> (~28% of total TP) with a mean elevation of ~4,900 m and has a semi-arid plateau climate with precipitation ranging from 100–300 mm (Yao et al., 2018b). Most lakes in the endorheic basin were expanding under the influence of climate change/variability as opposed to many other places in the TP, e.g., Lake Selin Co exceeded Lake Nam Co in area and consequently became the largest lake in the endorheic basin between 2011–2012 and expanded by 26% over the past 40 years (Zhou et al., 2015), whereas Lake Yamzhog Yumco (outside the endorheic basin, 350 km to the southeast of Selin Co) shrunk by ~11% during 2002–2014 according to Wan et al. (2016). Located in the southeast endorheic basin, the Lake Nam Co basin covering about 10,800 km<sup>2</sup>, with 19% of the basin lake water area and a mean lake elevation of ~4,730 m was chosen as a field experiment spot. The mean annual temperature and precipitation of Lake Nam Co are 1.3 °C, and 486 mm, respectively (Li et al., 2017a). The other experiment spot was Lake Yamzhog Yumco, which has a mean lake elevation of ~4,440 m. Subjected to steep mountainous terrain, the lake has a narrow-strip shape with complex shorelines. The basin of Lake Yamzhog Yumco covers ~6,100 km<sup>2</sup>, with mean annual temperature and precipitation of 2.8 °C and ~360 mm, respectively (Yu et al., 2011). [An overall map of experiment lakes is shown in Figure 2.](#)

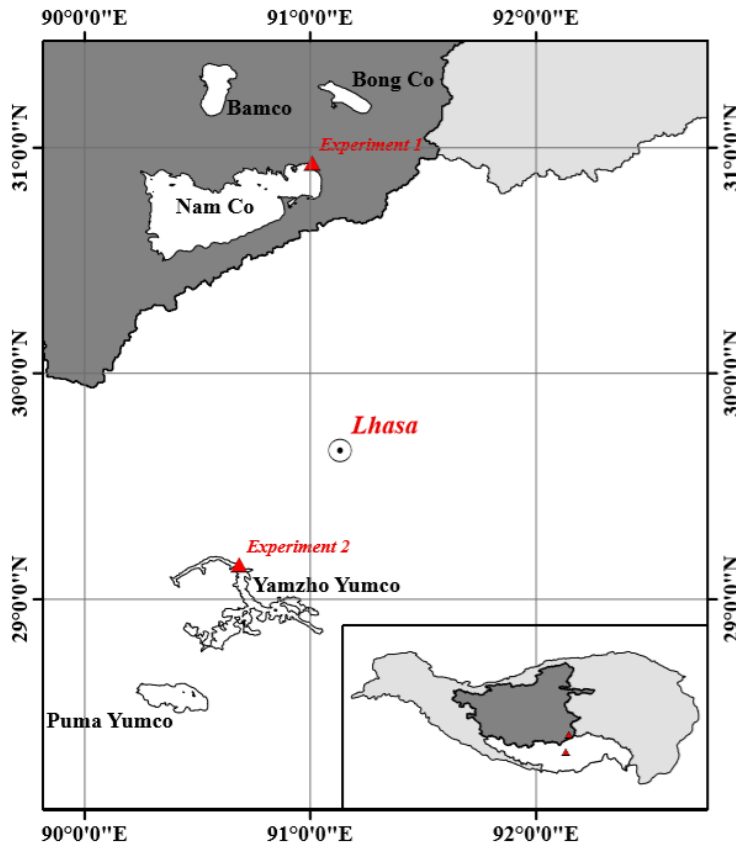

**Figure 2 Experiment locations: Nam Co and Yamzhog Yumco. Nam Co is located in the endorheic basin of the TP, while Yamzhog Yumco is located in the upper Brahmaputra River basin. Both lakes are close to the city Lhasa.**

## 2.2 Data

- 5 Multisource altimetry data were used in this study as shown in [Table 2](#)~~Table 2~~. The earliest record dates back to 2002 (i.e., [ENVISAT](#)~~Envisat~~ and Jason-1) and the latest record ends in 2017 (i.e., Jason-3 and CryoSat-2, [see Figure 1](#)). Most of 52 lakes examined in this study were covered by [ICESat-1](#)~~ICESat~~, [ENVISAT](#)~~Envisat~~, and CryoSat-2 data. Jason-1/2/3 data were available only on 12 lakes due to the relatively sparse ground tracks or data quality issues. Note that Jason-2 inherited the orbit of Jason-1 after its launch in 2008, whereas Jason-1 was shifted into an interleaved orbit and continued functioning until 2013,
- 10 thereby increasing the spatial coverage of Jason altimetry series to some degree, e.g., Jason-1 data in Lake Qinghai, the largest lake on the TP, were only available after 2008 due to the orbit shift. [ICESat-1](#)~~ICESat~~ and CryoSat-2 data have the best spatial coverage but relatively long repeat cycles of 91 days and 369 days (Bouzinac, 2012; Zhang et al., 2011). The [ENVISAT](#)~~Envisat~~ mission has [a lower](#)~~a moderate set of~~ orbital parameters [than Jason-1/2/3 but higher than ICESat](#), [resulting in a moderate](#)~~to~~ [balance its](#) spatial coverage and [a](#) temporal resolution of 35 days (Benveniste et al., 2002). In order to determine if the altimetry

data fall into the study lakes, a lake shape data set generated by Wan et al. (2016) was used. E.g., Data from all altimeters are available in a lake named Zhari Namco, as shown in [Figure 3](#).

It should be noted that different altimeters vary in the working wavelength and mechanism, e. E.g., Jason-1/2/3 work in LRM (Low Resolution Mode) at the Ku band and C band. The so-called Low Resolution Mode is typical for the early version of satellite altimeters such as TOPEX/Poseidon, Jason-1, and Envisat. Envisat/RA-2 works at the Ku-band and S-band. CryoSat-2/SIRAL working at a single Ku band has three modes including LRM, SAR, and InSAR, which are designed to have an increasing resolution in turn and work in different zones. The InSAR mode uses interference phenomena so that shift of the nadir point across the track can be detected, improving the altimeter's performance on ice sheets with slopes (Bouzinac, 2012). The ICESat/GLAS, as we mentioned before, is a laser altimeter working in the near infrared band.

We used Landsat TM/ETM+/OLI Surface Reflectance data sets provided by GEE to generate information on lake shore and lake area changes. TM images covered 2000–2011, whereas ETM+ images covered 2000–2017 and OLI images covered 2013–2017. ~~Though Landsat ETM+ suffered sensor failure and all the ETM+ images contain gaps after 2003 (Markham et al., 2004), we managed to make use of some images with gaps in generating lake shore changes. All the images were processed online using GEE API. Preprocessing such as radiometric calibration, atmospheric correction, as well as geometric correction was already performed in the production of the data sets.~~ There were more than 20,000 images processed and a half of them were excluded from the final results due to cloud contamination or gaps.

We collected daily in situ water level measurements in Lake Yamzhog Yumco for validation purposes with a pressure-type water level sensor. The in situ water level measurements spanned a half year from May to October 2018. We also performed unmanned aerial vehicle (UAV or drone) imaging over a 1 km–lake bank in Lake Yamzhog Yumco and Lake Nam Co for a better knowledge of experimental environment.

In addition, GF-2 images were used to performed a rigorous statistical analysis of the uncertainty in the derived optical water levels by taking the GF-2 derived lake shoreline position as the ground truth to analyse the sub-pixel water area ratios of Landsat image pixels (see Section 4). GF-2 images have as spatial resolution of 0.8 meters-m for the panchromatic band and pre-processesing such as including ortho-rectification and radiometric calibration were performed. Before analysis, we performed image to image registration with manually selected tie points between GF-2 and corresponding Landsat OLI images until the co-registration error meets with a satisfactory value of ~2 m.-and

**Table 2. Multisource altimetry data used in this study**

| Mission | Sensor<br>type<br>(Type) | <a href="#">Data<br/>record</a> | Duration | Repeat<br>cycle | Footprint<br>interval | Footprint<br>diameter | Lake no.<br>with data | Data<br>source |
|---------|--------------------------|---------------------------------|----------|-----------------|-----------------------|-----------------------|-----------------------|----------------|
|---------|--------------------------|---------------------------------|----------|-----------------|-----------------------|-----------------------|-----------------------|----------------|



|                                               |                                                                           |                                                  |                |                           |        |                                                                 |    |       |
|-----------------------------------------------|---------------------------------------------------------------------------|--------------------------------------------------|----------------|---------------------------|--------|-----------------------------------------------------------------|----|-------|
| <b>Jason-1</b>                                | <a href="#">Poseidon-2</a><br>(Radar) <del>Rad</del><br><del>af</del>     | <a href="#">S-GDR</a>                            | 2002–2013      | 10 d                      | ~300 m | 2–4 km                                                          | 12 | Aviso |
| <b>Jason-2</b>                                | <a href="#">Poseidon-3</a><br>(Radar) <del>Rad</del><br><del>af</del>     | <a href="#">S-GDR</a>                            | 2008–          | 10 d                      | ~300 m | 2–4 km                                                          | 12 | Aviso |
| <b>Jason-3</b>                                | <a href="#">Poseidon-3B</a><br>(Radar) <del>Rad</del><br><del>af</del>    | <a href="#">S-GDR</a>                            | 2016–          | 10 d                      | ~300 m | 2–4 km                                                          | 12 | Aviso |
| <del>ENVISAT</del><br><a href="#">Envisat</a> | <del>Radar</del> <a href="#">RA-2</a><br>(Radar)                          | <a href="#">GDR</a>                              | 2002–2010      | 35 d                      | ~390 m | 3.4 km                                                          | 35 | ESA   |
| <b>CryoSat-2</b>                              | <a href="#">SIRAL</a><br><del>Interferome</del><br><del>ter</del> (Radar) | <a href="#">InSAR</a><br><a href="#">Level 1</a> | 2010–          | 369 d (Sub<br>cycle 30 d) | ~280 m | ~1.65 km<br>(across<br>track)<br><br>~300 m<br>(along<br>track) | 51 | ESA   |
| <del>ICESat-</del><br><del>ICESat</del>       | <del>Laser</del> <a href="#">GLAS</a><br>(Laser)                          | <a href="#">GLAH 14</a>                          | 2003 –<br>2009 | 91 d                      | ~170 m | ~70 m                                                           | 42 | NASA  |

### 3 Methodology

To investigate changes in lake storage, changes in lake water level and lake area need to be derived from multisource remote sensing. First, water levels from various satellite altimeters (see Figure 1) for each lake as well as changes in lake shoreline and area from optical remote sensing images (i.e., Landsat TM/ETM+/OLI) were derived. Second, the systematic biases between different altimetry data were removed by either comparing the mean water level of the overlap period or comparing the two water level time series with changes in lake shoreline, depending on the length of the overlap period. The lake shoreline changes, termed as the optical water levels against altimetry water levels in this study, can serve as a unique source of information reflecting water level changes as well as a data merging reference. We will show that after deriving two or three regression parameters, lake shoreline changes can well represent lake water levels with comparable accuracy as altimetry-

derived water levels. Third, with information on changes in water level and water area derived from altimetry data and optical remote sensing images, the hypsometric curve that describes the relationship between the lake water level and lake water storage changes can be derived. Fourth, the integral of the hypsometric curve was performed to convert water level time series into lake storage change time series. Details will be illustrated in the following sections.

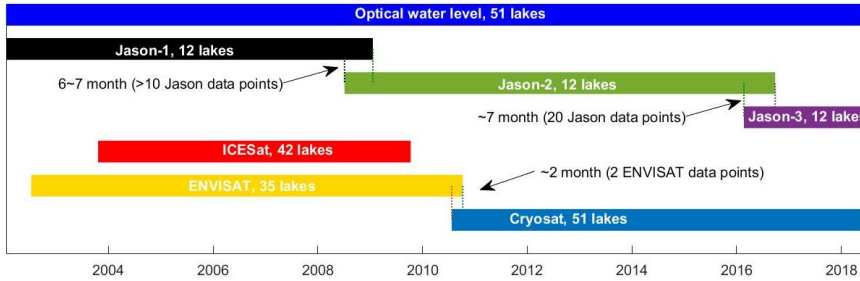

**Figure 1. Spatial (the number of lakes covered) and temporal coverage and their overlap periods of multiple satellite altimetry missions used in this study, including Jason-1/2/3, ENVISAT, ICESat-1, and CryoSat-2.**

### 3.1 Altimetry water level

The first step of deriving altimetry water levels is to select correct ground tracks and valid footprints falling on the lakes. Because there is a random ground track shift at ~1 km in different cycles for most altimetry missions, it is uncertain that valid lake footprints can be obtained for each cycle, even though the nominal ground track seems crossing the lake. This problem can be addressed by comparing the geographic coordinates of the footprints with a lake shape data set (Wan et al., 2016). After picking out the valid footprints, the lake surface height can be calculated for each footprint. All radar altimetry data share a relationship:

$$LSH = Alt - (Range + cor)$$

Eq 1

where *LSH* represents the lake surface height with respect to the geoid. *Alt* represents the altimeter height with respect to the reference ellipsoid. *Range* represents the distance between the altimeter and lake surface. *cor* represents several range corrections including retracking correction, wet/dry troposphere correction, ionosphere correction, pole/solid tide correction, and geoid correction. The retracking range correction plays an important role in removing the contamination of land signal when the altimetry data are applied to inland water bodies. In this study, Jason-1/2/3 data were retracked using a classical waveform retracking algorithm named the improved threshold method (ITR), whereas CryoSat-2 data were retracked using the narrow primary peak threshold (NTTP) method (Birkett and Beckley, 2010; Cheng et al., 2010; Jain et al., 2015). Retracking corrections were not performed for ENVISAT and ICESat data, because the ENVISAT/RA-2 product already provided a retracked range using the ICE-1 method and the ICESat GLAH14 product already included several corrections that are sufficient for most applications including studies on inland water bodies (Zhang et al., 2011).

For each cycle of an altimeter, it is common that more than one footprint fall on a study lake, thereby providing several LSH observations on the same day. After removing outliers with the three-sigma rule, frequency distributions of the LSHs from the same cycle were calculated. The mean value of the histogram bin with the highest frequency ~~the highest bucket of the histogram~~ was selected to represent the LSH for the cycle. Meanwhile, the frequency of the chosen bucket was reserved to evaluate the data quality for the cycle, e.g., a cycle was marked as high quality if the frequency is higher than 0.8, moderate quality if it is only higher than 0.5, and poor quality if the frequency is lower than 0.5. The LSH from each cycle constituted the lake water level time series for the study lake. LSHs that were marked as poor quality and obviously deviated from the moving average were removed from the altimetry-based lake water level time series.

It is not uncommon that systematic biases exist in different altimetry data sets due to the variation in orbit, discrepancy between correction models, errors associated with sensors, and even the choice of the reference datum. After deriving lake water level time series for each altimeter, we first merged the ~~Envisat~~ Envisat and ~~ICESat-1~~ ICESat water levels if both were available for a lake, because they have the longest overlap period (Figure 1). We chose ~~Envisat~~ Envisat-derived water levels as the baseline and removed the difference of the mean value of the overlap period between the two products, because ~~Envisat~~ Envisat data are generally denser and longer than ~~ICESat-1~~ ICESat data. A similar process was applied to Jason-1/2/3, as there are two overlap periods connecting the three altimeters together. ~~Figure 3~~ Figure shows a result of altimetry data merging when all sensors are available.

There are tradeoffs between CryoSat-2 and Jason-2/3 data in terms of spatial coverage and time span. CryoSat-2 data are available for all study lakes but they only have the overlap period with Jason-2/3 data, whereas Jason-2/3 data are only available for 12 lakes. For most lakes without Jason-2/3 data, we merged CryoSat-2 data with either ~~ICESat-1~~ ICESat or ~~Envisat~~ Envisat using optical water levels spanning from 2000 to 2017, because there is no overlap period between these altimetry water levels (See Figure 1). Details on optical water levels and how they aid merging the altimetry water levels can be found in section 3.2.

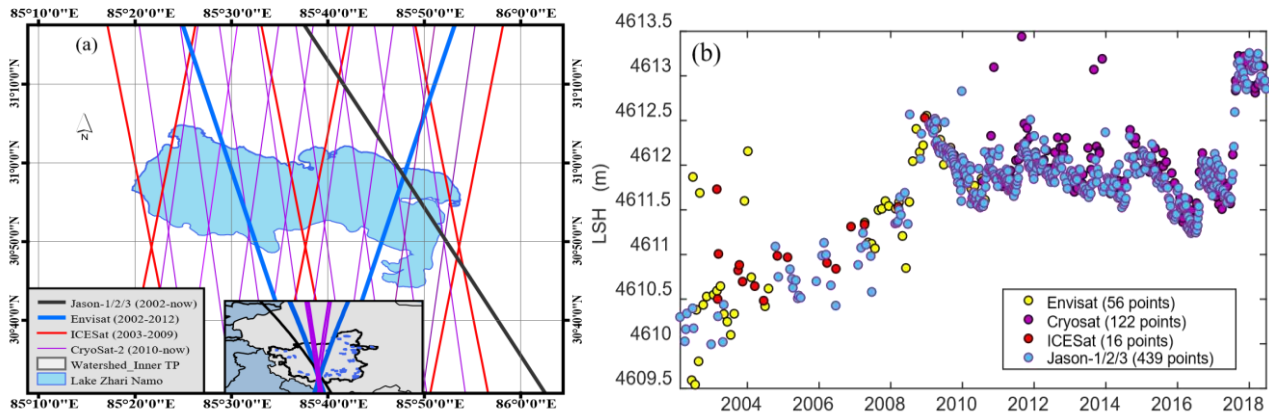

**Figure 32.** (a) Ground tracks of multiple altimetry missions over Lake Zhari Namco and (b) the merged altimetry water levels for Lake Zhari Namco.

### 3.2 Optical water level

For most lake basins, it is possible to find a relatively flat part of lake banks with an average slope of 1/30 or smaller, where obvious interannual or intra-annual changes in lake shorelines can be detected using high-spatial-resolution Landsat images (30 m). These locations can be found by comparing lake images from the first year and the last year of the study period if the lake shows a clear expanding/shrinking trend. Otherwise, we can compare images acquired in early summer when the LSH is at lowest with those acquired in late autumn when the lake expands to its limit. In this study, we assumed that the selected lake bank was flat enough such that the relationship between changes in lake water level and shoreline can be depicted in a linear or quasi-linear (parabolic) way. [Thus, we can transform the lake shoreline changes into optical water levels by fitting with altimetry water levels.](#) The validity of this assumption can be evaluated with the coefficient of determination ( $R^2$ ) for each lake as shown in [Table 3Table 3](#). For most lakes, the goodness of fit is higher than 0.7, suggesting the generally good fitting relationship between changes in lake level and shoreline.

Though there were ~500 Landsat images obtained for the selected lake banks during the study period, many of them were largely affected by cloud or cloud shadow. [All the images were processed online using GEE API. Pre-processing such as radiometric calibration, atmospheric correction, as well as geometric correction were already performed in the production of the data sets.](#) In addition, the failure of Landsat 7 sensor SLC left all the Landsat 7 images with gaps after 2003 (Markham et al., 2004), making the available images even fewer. [We managed to make use of some images with gaps in generating lake shore changes.](#) By choosing the region of interest (ROI) that is parallel to the Landsat 7 gaps, we can use most of the Landsat 7 images. However, the width of ROI must be reduced to avoid shifting gaps as shown in [Figure 4Figure 3 \(b\)](#). The gaps may vary with time but are more like vibration around the mid-point. The ROI did not fill the interval of gaps, because the wider the ROI, the higher possibility of shifting gaps cross it.

Changes in lake shorelines were characterized by changes in the water surface ratio detected in the ROI. To automatically extract changes in water surface from tremendous amount of Landsat archives on GEE, the water index and Otsu threshold method were jointly used. We calculated the Normalized Difference Water Index (NDWI) and the Modified Normalized Difference Water Index (MNDWI) of input images and compared their performance in different seasons. It was found that the MNDWI tends to be more sensitive to shallow water in summer, but is less effective than NDWI when the lake bank is covered by snow in the cold season as shown in [Figure 5Figure 4](#). Therefore, the two water indices were jointly used in this study by applying the MNDWI to images acquired during May to October and applying the NDWI to the rest months. The NDWI and MNDWI can be calculated as follows (McFeeters, 1996; Xu, 2005):

$$NDWI = \frac{B_{green} - B_{NIR}}{B_{green} + B_{NIR}} \quad \text{Eq 2}$$

$$MNDWI = \frac{B_{green} - B_{SIR}}{B_{green} + B_{SIR}}$$

where  $B_{green}$ ,  $B_{NIR}$ , and  $B_{SIR}$  refer to reflectance of bands 2, 4, 5 for Landsat TM/ETM<sup>+</sup> images and bands 3, 5, 6 for Landsat OLI images.

After calculating the water index, the grayscale image was binarized using the Otsu method. If the selected ROI comprises ~50% water and ~50% land, the performance of the method is good, as the distribution of digital numbers of the grayscale image is close to the assumption of the bimodal histogram implicit in the Otsu algorithm (Kittler and Illingworth, 1985; Otsu, 1979). The binarized images were further processed to provide the water surface ratio in the ROI, which represents changes in lake shoreline. The time series of changes in lake shoreline were then converted into optical lake water levels using linear regression or second-order polynomial fit with altimetry-derived water levels ([Figure 4](#)~~Figure 3~~ (c)-(d)). [For most cases we only used linear regression, only for 2 lakes with Jason-1/2/3 data we performed the second-order polynomial fit. ~~B~~, because a higher-order regression requires more input information to ensure the reliability.](#)

However, cloud, cloud shadow, and shifting gaps may contaminate the ROI and cause errors in the optical water levels. Therefore, the QA band of the Landsat Surface Reflectance product was used to filter the images. The data would be excluded if the fraction of the cloud or cloud shadow-covered area in the ROI was higher than 5%. For every Landsat ETM<sup>+</sup> image acquired after 2003, the pixel number of the ROI was counted and compared with those acquired before 2003. If the loss of pixels exceeded 2%, the ROI was considered to be affected by gap and the data were consequently excluded from the subsequent analysis.

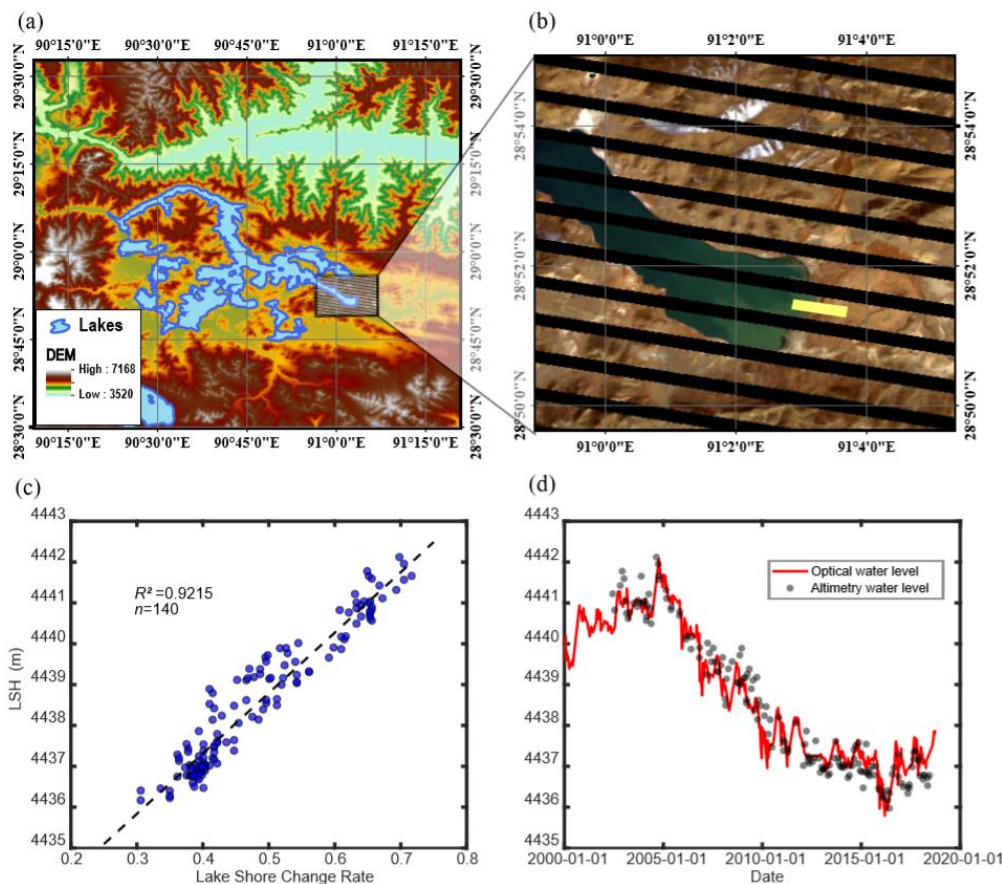

**Figure 43.** (a) Lake Yamzhog Yumco and its surroundings. The DEM was extracted from the STRM Global 90-m DEM product; (b) ROI (yellow region) selected from a Landsat ETM+ image for detecting changes in lake shoreline and the gaps (black region); (c) linear regression of the lake shoreline change and altimetry water level for Lake Yamzhog Yumco; and (d) optical water levels and altimetry water levels for Lake Yamzhog Yumco.

A critical function of optical water levels is to aid the merging of altimetry water levels when there ~~is~~<sup>are</sup> no overlapping periods between altimeters or the overlapping periods is too short. For lakes without Jason-1/2/3 data, Lake shoreline changes were firstly translated into optical water levels by fitting with CryoSat-2 data (Figure 4), functioning as extrapolation of CryoSat-2 to 1–2 years. Then, we applied the same method of merging Jason-1/2/3, to merge the extrapolated CryoSat-2 data with either

Envisat or ICESat data. In doing so, we were able to remove all systematic biases between multisource altimetry-derived water levels. After the merging of altimetry water levels, we will perform the regression analysis for the second time between optical water levels and merged altimetry water levels to check if the linear relationship is stable during the whole entire study period and different elevations. If the linear relationship is stable the optical water levels will be merged with the altimetry water levels using the linear fitting parameters from the second regression analysis. Otherwise, there might

be a change in the lake bank slope and the extrapolation of CryoSat-2 data with optical water levels might not be proper. If so, we will reselect the ROI to extract the lake shore-line changes and redo the altimetry data merging until the optical water



levels and merged altimetry water levels agree well with each other in the second linear regression. Detailed analysis about the potential extrapolation issue can be found in the supplementary file. ~~All the water levels were with respect to EGM 96.~~ To summarize ~~about~~ the altimetry data merging: the basic idea of removing the systematic bias is to calculate the mean of two altimetry-based water level time series from different sources during the overlap period. Then, the difference between the mean time series and either water level time series is removed to make both altimetry-based water level time series consistent and form a longer water level time series. This process was subsequently applied to all water level time series with overlap periods to merge them into a single time series for each lake. However, the overlap period could be short between some altimeters such as Envisat and CryoSat (e.g., there are only one or two data points in the overlap period), or does not exist at all, such as ICESat and CryoSat. On these cases, optical water levels (i.e., changes in lake shoreline that need to be translated into changes in water levels using linear regression with one of the altimetry water level time series) are used to extend or create an overlap period that links the two altimetry missions.

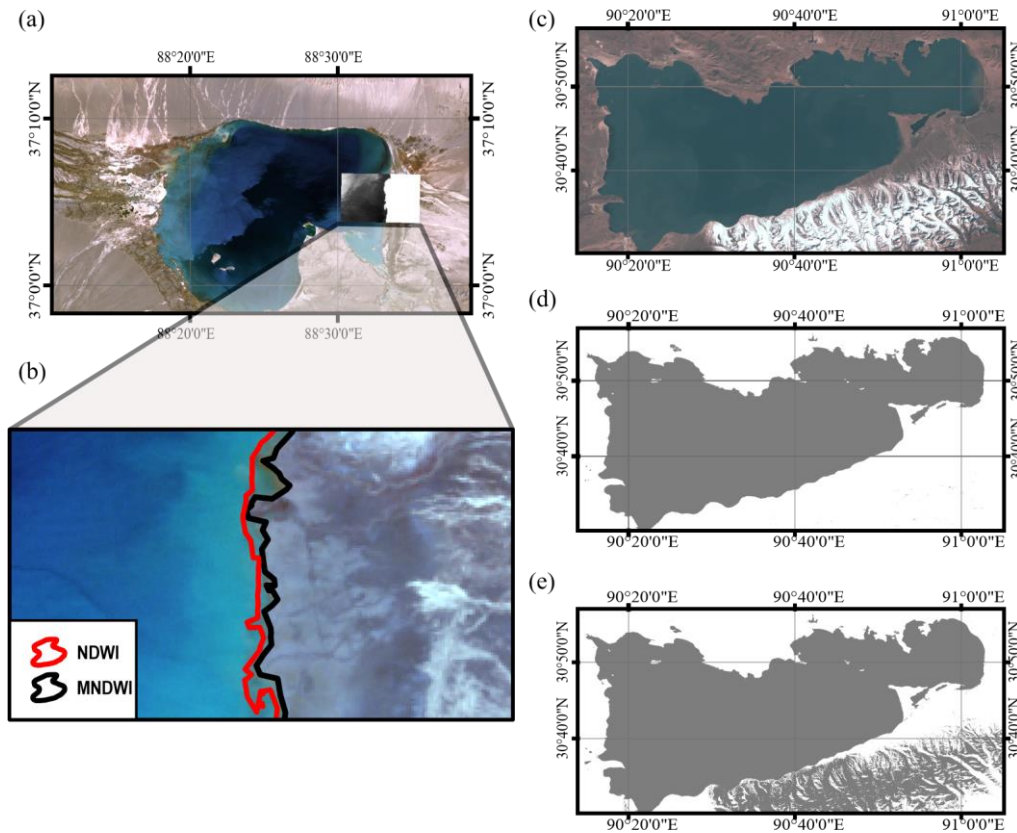

**Figure 5.4.** (a) Landsat ETM+ image of the Aqqikkol Lake acquired in summer in 2001; (b) water extraction result using the MNDWI and NDWI, showing that the MNDWI performs better in detecting shallow water; (c) Landsat OLI image of Lake Nam Co acquired in winter in 2015; (d) water extraction result of the NDWI, showing good performance in distinguishing water from snow; and (e) result of the MNDWI, showing some confusion of water and snow.

3.3 Hypsometry

We derived the hypsometric curve for each study lake by polynomial fitting of the lake area and level time series. The lake area comprises two parts: the inner invariable part and the outer variable part. As the variable water area is of more concern in this study, ROIs for extracting changes in lake area only cover the lake shoreline and its neighbouring area as shown in [Figure 6](#)

[Figure 5](#). The inner part of the water body was calculated only once and considered as invariant, making the calculation more efficient on GEE. Meanwhile, more images are available as the area of ROI becomes smaller, because the possibility of clouds covering the ROI is reduced compared with an ROI covering the entire lake. The Landsat ETM<sup>+</sup> images after 2003 were not included in this part of calculation as gaps negatively affected the ROI for lake area extraction. Similar to Section 3.2, we selected images with less than 5% cloud cover on an ROI to generate time series of changes in lake area, obtaining 20~30 data points on average for regression.  $R^2$  values for each lake are listed in [Table 3](#), indicating that most lake basins agree well with the parabolic hypsometric curve.

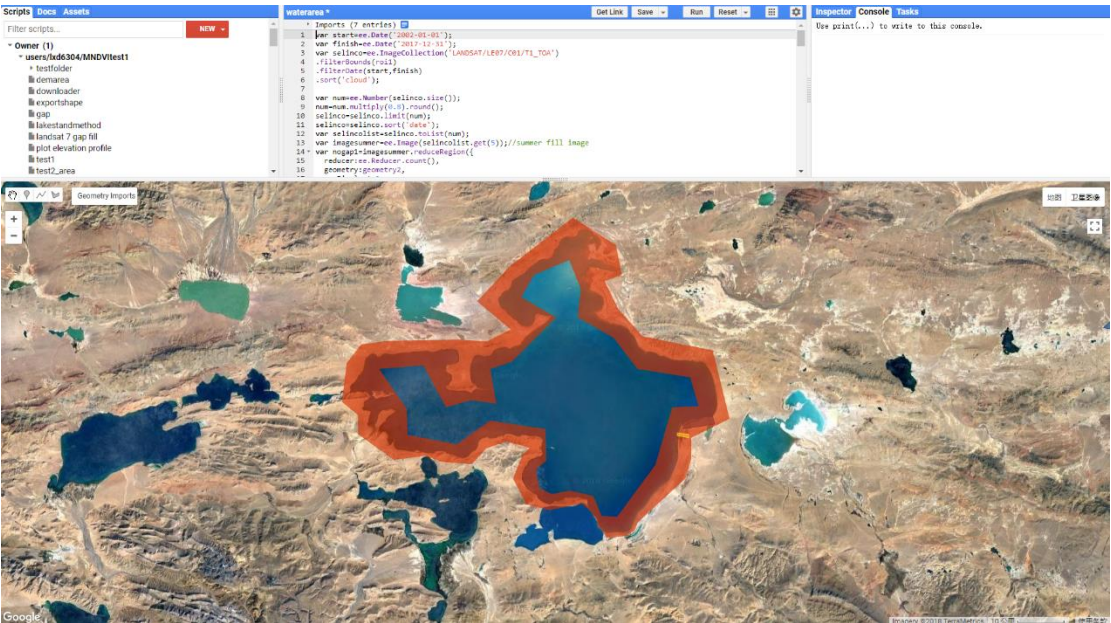

**Figure 6**. Programming interface of GEE. The red polygon was the ROI for lake area change extraction of Lake Selin Co.

**Table 3.** Information on regression analysis of study lakes.

| Lake Name     | Lake Area<br>km <sup>2</sup> | No. of optical<br>water level | $R^2$ of optical water<br>level (No. of data pairs) | $R^2$ of hypsometric curve<br>(No. of data pairs) | Hypsometric function                       |
|---------------|------------------------------|-------------------------------|-----------------------------------------------------|---------------------------------------------------|--------------------------------------------|
| Ake Saiy Lake | 260.74                       | 113                           | 0.8951 (14)                                         | 0.9556 (21)                                       | $S=0.45dh^2+11.26dh+163.97$ , $dh=H-4846$  |
| Aqqikkol Lake | 538.21                       | 354                           | 0.9717 (44)                                         | 0.9353 (36)                                       | $S=2.36dh^2+0.21dh+370.29$ , $dh=H-4252$   |
| Ayakkum Lake  | 987.23                       | 183                           | 0.9651 (50)                                         | 0.9695 (57)                                       | $S=0.16dh^2+65.72dh+658.28$ , $dh=H-3878$  |
| Bamco         | 255.81                       | 209                           | 0.901 (14)                                          | 0.9287 (27)                                       | $S=0.28dh^2+2.84dh+206.46$ , $dh=H-4560.5$ |



|                    |         |     |              |              |                                            |
|--------------------|---------|-----|--------------|--------------|--------------------------------------------|
| Bangong Co         | 661.64  | 232 | 0.5164 (172) | 0.7991 (29)  | $S=1.43dh^2+15.67dh+619.28$ , dh=H-4238    |
| Chibzhang Co       | 541.96  | 49  | 0.8766 (19)  | 0.9792 (15)  | $S=0.69dh^2+3.36dh+475.79$ , dh=H-4930     |
| Co Ngoin1          | 268.37  | 174 | 0.6637 (15)  | 0.8803 (62)  | $S=3.67dh^2+1.33dh+263.1$ , dh=H-4564.5    |
| Cuona Lake         | 192.15  | 254 | 0.7607 (12)  | 0.8876 (27)  | $S=1.77dh^2+3.6dh+184.79$ , dh=H-4585.5    |
| Dagze Co           | 310.8   | 192 | 0.8334 (67)  | 0.8862 (28)  | $S=0.08dh^2+6.14dh+230.51$ , dh=H-4460     |
| Dogai Coring       | 492.39  | 257 | 0.8624 (152) | 0.9048 (33)  | $S=3.2dh^2+5.66dh+427.17$ , dh=H-4816      |
| Dogaicoring Qangco | 403.18  | 162 | 0.9202 (37)  | 0.9218 (47)  | $S=0.53dh^2+3.93dh+279.6$ , dh=H-4786      |
| Donggei Cuona Lake | 247.83  | 561 | 0.8776 (38)  | 0.925 (101)  | $S=0.54dh^2+7.22dh+222.19$ , dh=H-4084     |
| Dung Co            | 139.4   | 145 | 0.9218 (49)  | 0.8652 (28)  | $S=0.07dh^2+2.3dh+137.06$ , dh=H-4547      |
| Goren Co           | 477.95  | 191 | 0.6166 (24)  | 0.9096 (41)  | $S=2.91dh^2+0.03dh+468.33$ , dh=H-4648.5   |
| Gozha Co           | 246.91  | 96  | 0.4297 (12)  | 0.5564 (19)  | $S=1.57dh^2+0.06dh+254.43$ , dh=H-5082     |
| Gyaring Lake       | 535.84  | 253 | 0.6217 (20)  | 0.3451 (71)  | $S=1.99dh^2+2.8dh+517.18$ , dh=H-4292      |
| Har Lake           | 621.52  | 370 | 0.8652 (63)  | 0.9893 (50)  | $S=1.1dh^2+1.52dh+582.34$ , dh=H-4075      |
| Hoh Xil Lake       | 351.3   | 132 | 0.9038 (12)  | 0.9355 (27)  | $S=1dh^2+5.29dh+300.5$ , dh=H-4887.1       |
| Jingyu Lake        | 339.69  | 224 | 0.8978 (51)  | 0.989 (34)   | $S=0.37dh^2+4.77dh+238.43$ , dh=H-4710     |
| Kusai Lake         | 328.8   | 295 | 0.9787 (151) | 0.8987 (49)  | $S=0.52dh^2+5.04dh+254.67$ , dh=H-4473     |
| Kyebxang Co        | 187.32  | 233 | 0.75 (12)    | 0.8753 (135) | $S=0.16dh^2+5.4dh+150.9$ , dh=H-4619       |
| Langa Co           | 256.03  | 167 | 0.859 (157)  | 0.888 (47)   | $S=-0.19dh^2+4dh+249.28$ , dh=H-4564       |
| Lexiewudan Co      | 273.63  | 286 | 0.9216 (49)  | 0.9496 (40)  | $S=0.13dh^2+4.63dh+219.65$ , dh=H-4868     |
| Lumajiangdong Co   | 386.71  | 220 | 0.9135 (28)  | 0.9708 (17)  | $S=0.62dh^2+2.09dh+353.95$ , dh=H-4812     |
| Mapam Yumco        | 412.69  | 163 | 0.7096 (30)  | 0.9973 (30)  | $S=1.18dh^2+5.16dh+399.68$ , dh=H-4584     |
| Margai Caka        | 137.7   | 247 | 0.9399 (12)  | 0.9955 (35)  | $S=0.03dh^2+5.14dh+112.12$ , dh=H-4791     |
| Memar Co           | 167.3   | 193 | 0.911 (39)   | 0.8626 (20)  | $S=0.27dh^2+3.17dh+134.69$ , dh=H-4923     |
| Nam Co             | 2028.5  | 187 | 0.9064 (62)  | 0.8749 (18)  | $S=2.43dh^2+5.55dh+1970.1$ , dh=H-4724.5   |
| Ngangla Ringco     | 492.86  | 88  | 0.4652 (25)  | 0.9498 (7)   | $S=3.87dh^2+3.86dh+490.69$ , dh=H-4715     |
| Ngangze Co         | 471.21  | 245 | 0.9538 (236) | 0.9332 (49)  | $S=0.2dh^2+7.03dh+391.21$ , dh=H-4680      |
| Ngoring Lake       | 656.83  | 86  | 0.844 (71)   | 0.8613 (14)  | $S=4.69dh^2+5.04dh+613.66$ , dh=H-4270     |
| Paiku Co           | 272.85  | 231 | 0.8341 (21)  | 0.9079 (61)  | $S=0.91dh^2+2.64dh+264.89$ , dh=H-4578.5   |
| Puma Yumco         | 290.98  | 250 | 0.6871 (18)  | 0.5629 (53)  | $S=0.48dh^2+0.8dh+286.34$ , dh=H-5011      |
| Pung Co            | 176.93  | 187 | 0.8017 (12)  | 0.9841 (31)  | $S=0.03dh^2+3.75dh+151.66$ , dh=H-4526     |
| Qinghai Lake       | 4495.33 | 323 | 0.9011 (151) | 0.8181 (19)  | $S=3.45dh^2+155.03dh+4084.73$ , dh=H-3193  |
| Rola Co            | 169.83  | 347 | 0.7842 (18)  | 0.9403 (96)  | $S=-0.88dh^2+14.87dh+115.59$ , dh=H-4816   |
| Salt Lake          | 144.3   | 206 | 0.9344 (16)  | 0.9858 (32)  | $S=0.16dh^2+0.69dh+37.42$ , dh=H-4430      |
| Salt Water Lake    | 212.47  | 347 | 0.9086 (27)  | 0.9494 (151) | $S=-0.82dh^2+17.31dh+133.71$ , dh=H-4901   |
| Selin Co           | 2300.49 | 179 | 0.9777 (70)  | 0.945 (22)   | $S=1.05dh^2+45.86dh+1754.31$ , dh=H-4536.4 |
| Tangra Yumco       | 862.94  | 100 | 0.9155 (18)  | 0.8072 (11)  | $S=0.94dh^2+0.28dh+862.94$ , dh=H-4536     |
| Taro Co            | 485.15  | 268 | 0.8903 (39)  | 0.9576 (19)  | $S=0.18dh^2+4.97dh+477.32$ , dh=H-4567.3   |
| Tu Co              | 448.64  | 257 | 0.9276 (41)  | 0.9875 (26)  | $S=0.02dh^2+4.91dh+396.59$ , dh=H-4926     |
| Urru Co            | 356.35  | 260 | 0.71 (49)    | 0.8994 (27)  | $S=1.35dh^2+2.67dh+345.34$ , dh=H-4553     |
| Wulanwula Lake     | 652.08  | 225 | 0.9679 (81)  | 0.9285 (10)  | $S=2.05dh^2+16.49dh+513.15$ , dh=H-4856    |

|                 |         |     |              |             |                                              |
|-----------------|---------|-----|--------------|-------------|----------------------------------------------|
| Xijir Ulan Lake | 463.36  | 316 | 0.9736 (84)  | 0.9691 (44) | $S=0.93dh^2+13.3dh+366.35$ , $dh=H-4770.8$   |
| Xuru Co         | 209.87  | 144 | 0.5984 (9)   | 0.5527 (58) | $S=0.12dh^2+0.22dh+206.53$ , $dh=H-4714$     |
| Yamzho Yumco    | 549.61  | 398 | 0.9215 (140) | 0.9364 (72) | $S=0.51dh^2+9.63dh+531.79$ , $dh=H-4436$     |
| Yelus Lake      | 203.4   | 486 | 0.7014 (21)  | 0.8352 (92) | $S=14.84dh^2+-5.77dh+185.15$ , $dh=H-4686.5$ |
| Yibug Caka      | 178.22  | 118 | 0.9206 (12)  | 0.9615 (25) | $S=-1.25dh^2+15.79dh+147.03$ , $dh=H-4558.5$ |
| Zhari Namco     | 1000.18 | 143 | 0.9177 (164) | 0.8388 (52) | $S=2.66dh^2+10.07dh+962.57$ , $dh=H-4610$    |
| Zhuonai Lake    | 160.1   | 260 | 0.9528 (11)  | 0.973 (21)  | $S=0dh^2+10.06dh+124.29$ , $dh=H-4742$       |
| Zige Tangeo     | 238.67  | 171 | 0.9008 (186) | 0.976 (24)  | $S=0.06dh^2+4.62dh+212.71$ , $dh=H-4565$     |

## 4 Validation of data quality

### 4.1 Field experiment

Most Tibetan lakes are located in remote and inaccessible regions, resulting in the scarcity of ground-based in situ measurements that are, however, vital for data quality assessment. We made some in situ measurements in two study lakes to validate the data quality of optical water levels developed in this study. ~~instead of t~~The data quality of satellite altimetry ~~data whose quality~~ on lakes or rivers has been widely investigated and thus it is not the focus beyond the scope of this our study known. Many studies used in situ water levels to calculate certain statistical metrics, e.g., root mean squared error (RMSE). However, results provided by different studies vary and could be associated with the cross-section width of the study water body in the ground track panel (Nielsen et al., 2017). This means that these results may not be comparable due to their unique applications. In addition, it is not rigorous to use in situ data of only one lake to represent the overall situation of study lakes in the uncertainty assessment for altimetry water levels. Instead, we used the standard deviation of valid footprints acquired in the same cycle as an estimate of uncertainty in altimetry-derived water levels. In contrast, the applicable condition of optical water levels is not so variable as that of altimetry data. Derivation of optical water levels requires relative flat bank as well as some altimetric information, which were available in all study lakes. Since these selected bank slopes were similarly small ( $\sim 1/30$ ), it is possible to use a few typical lakes to represent all study lakes. Therefore, we carried out a field experiment in Lake Yamzhog Yumco and Lake Nam Co to validate the derived optical water levels.

There were two main goals in our experiments: (1) collecting daily in situ water level data in a certain TP lake to validate the corresponding optical water levels statistically; (2) ~~imaging a certain length of the lake shore with UAV to testing~~ the performance of lake shore extraction based on high-resolution optical images (GF-2) so as to provide a theoretical uncertainty analysis of optical water levels. On Lake Yamzhog Yumco, we installed a pressure type water level sensor (type H5110-DY, manufactured by Shenzhen Hongdian technologies Co., Ltd.), which measures water pressure and temperature of the installation depth and converts them into water depths with a relative accuracy of  $\sim 0.1\%$ . The device was carried onto the lake and put  $\sim 20$  m below the water surface and 0.5 m above the lake bottom, which suggests an absolute error of  $\sim 2$  cm. ~~We chose a typical landscape (i.e., mild slope, little vegetation, and gravel lake beach) to perform UAV imaging in both Lake Yamzhog~~

Yumeco and Lake Nam Co in mid-May, 2018. The UAV was operating at a height of 200 m and imaging the ground at a constant rate in visible bands with a wide-angle lens. With a GPS tracker onboard, these UAV images were well georeferenced. Then image mosaic was performed using the Piz4D mapper and converted into a digital orthophoto map (DOM), which is a similar process described by Huang et al. (2018). The spatial resolution of UAV data reached ~5 cm as we compared a real ground object with its size in images. As for GF-2 images, the spatial resolution of the panchromatic band is 0.8 m, which is able to provide a very accurate reference of lake boundaries for the assessment of water classification results based on Landsat images. We used three GF-2 images acquired at different seasons (two in July and September, 2015, one in February 2016) and different places on the TP to better represent the local conditions when extracting optical water levels or lake water extent with Landsat images. Image co-registration was performed to ensure make sure that there was no obvious spatial shift between the GF-2 images and corresponding Landsat images. The accuracy of the image co-registration is ~2 m.

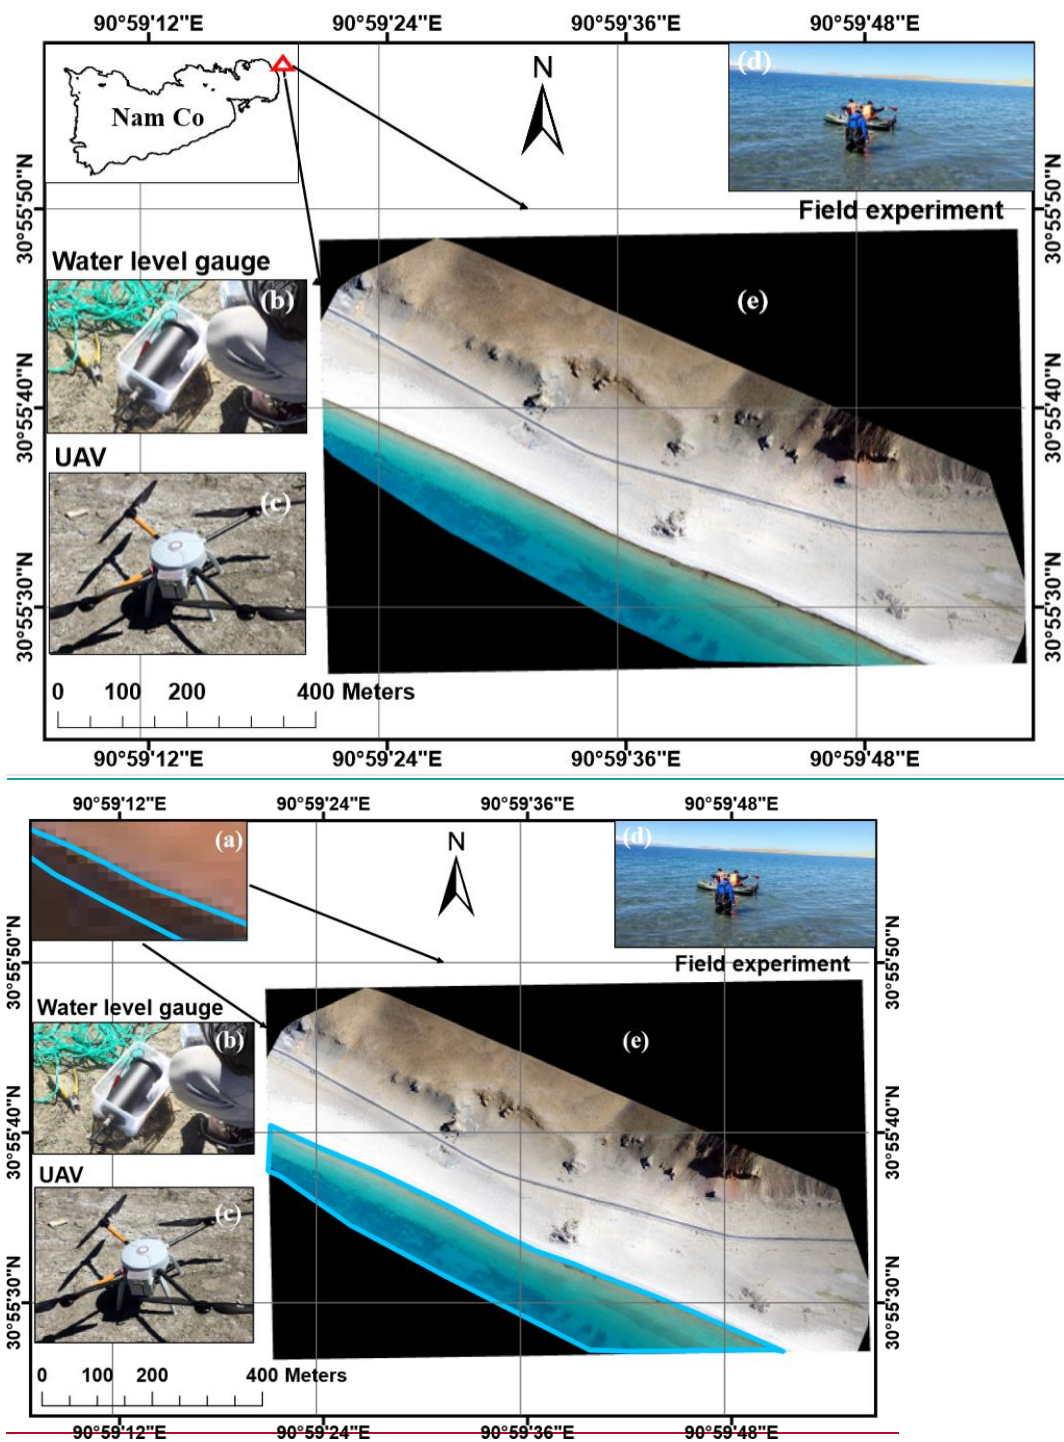

Figure 7. Field experiments in two study lakes: (a) [overview map](#) [Landsat 8 image](#) of the experiment spot; (b) pressure-type water level sensor; (c) unmanned aerial vehicle; (d) installation of the water level sensor; and (e) UAV image of a portion of the bank of Lake Nam Co.

## 4.2 Uncertainty analysis of optical water levels

Based on the in situ water level measurements made by the pressure-type water level sensor, we evaluated the accuracy of optical water levels statistically. There were 16 optical water level records available for the comparison against the in situ measurements. The RMSE of the water level anomaly was 0.11 m. The linear fit had a slope close to 1 and an  $R^2$  of 0.89, suggesting the good consistency of the in situ water level measurements and the derived optical water levels (Figure 8(b)). It should be noted that the optical water levels used for validation here were translated from lake shore changes using parameters derived from fitting with CryoSat-2 data, i.e., there is no in situ information involved in generating the optical water levels shown in Figure 8.

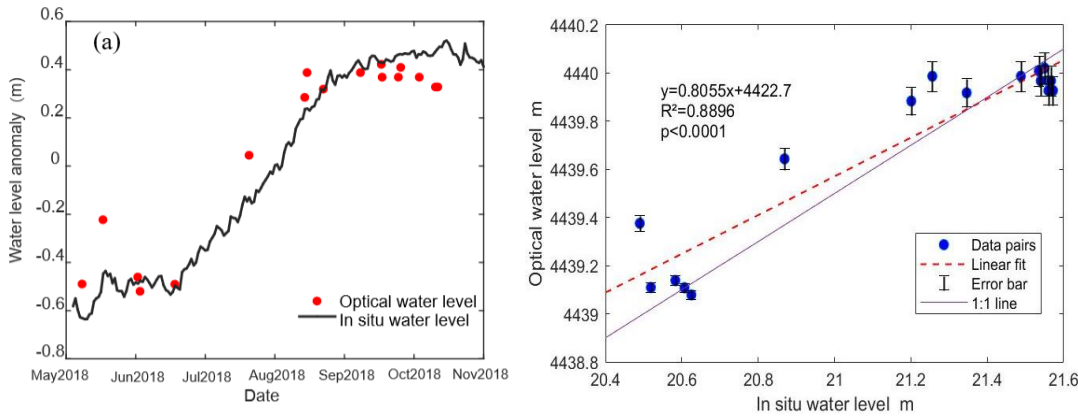

**Figure 8. (a) In situ water level anomaly versus optical water level anomaly in Lake Yamzhog Yumco; and (b) linear regression of the optical water levels and concurrent same period in situ water levels.**

To be more convincing, we performed a more theoretical uncertainty analysis of the optical water levels by looking at the original optical data and generation processes with the help of high-resolution GF-2 images UAV images. First, we took GF-2 images (after co-registration with the Landsat image of the same period, the co-registration errors were ~2 m) UAV images as the ground truth to determine the accurate position and shape of the lake shore line. Second, we performed water classification based on the concurrent same period Landsat OLI image that contained the UAV scanned area, with the combined water index method and Otsu algorithm to derive the binarized image. Landsat image pixels where the lake shoreline determined using the GF-2 UAV images crosses were delineated manually and marked as shoreline pixels as shown in Figure 9(a). Then the water area in each shoreline pixel was calculated.

Given that these shoreline pixels were classified as either water or land, a relationship between the water area ratio of the shoreline pixel and the probability of the pixel being classified as water can be derived. This relationship generally describes the function of the water classification method by telling how likely a pixel will be determined as water, given the water area ratio of the pixel. Based on the observations of a total of 4128 Landsat 64 UAV-scanned shoreline pixels, a power

function logistic type curve with two parameters that determine the position and shape of the curve was chosen to represent the water classifier as Eq 4 Eq 5 shows:

$$f(x) = x^n \frac{1}{1 + e^{-a(x-b)}} \quad \text{Eq 4}$$

where  $x$  represents the water area ratio in the shoreline pixel,  $f(x)$  represents the probability of the shoreline pixel being classified as water pixel,  $n$  is the  $a$  and  $b$  are parameters that determine the shape and position of the curve, respectively. The parameters  $n$  was  $a$  and  $b$  were determined using the maximum likelihood method. Results are shown in Figure 9 Figure 9 (be).

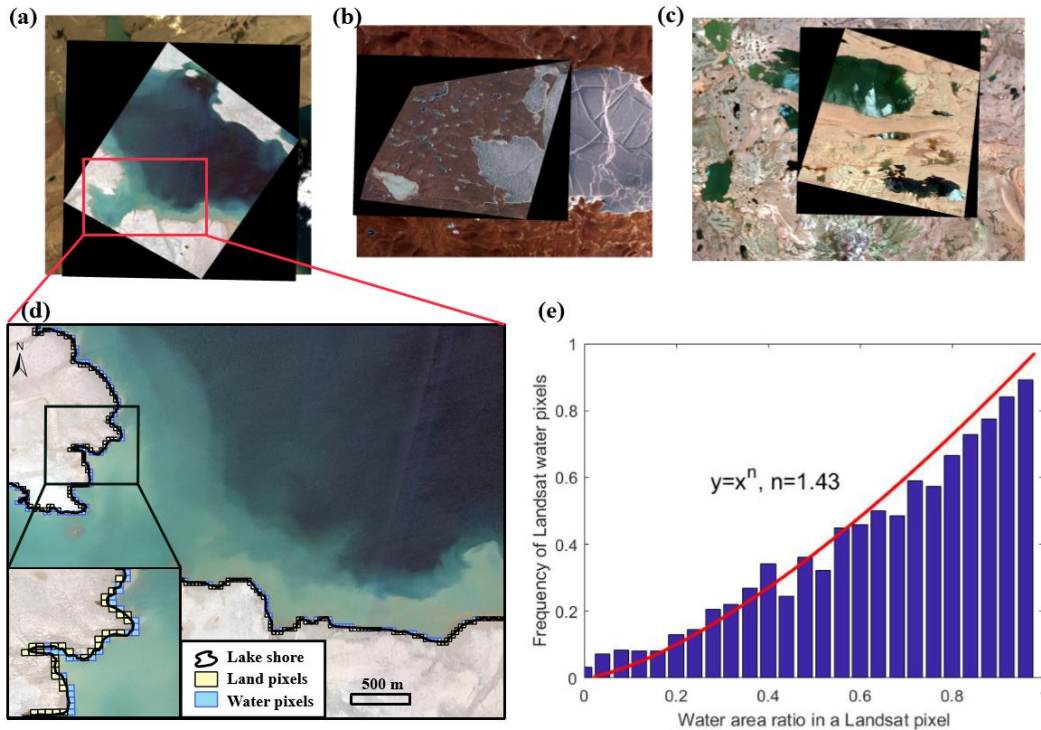

Figure 9. (a)~(c) GF-2 images (upper layer) and corresponding Landsat OLI images (bottom layer) acquired on 2015/9/7, 2016/1/29, 2015/7/5; (d) Landsat OLI shoreline pixels (the background is the GF-2 image), blue pixels pixels marked with 1 were classified as water, and yellow pixels marked with 0 were classified as land; (e) relationship between water area ratio in a pixel and the frequency/probability of the pixel being classified as water. Blue bars are the sampled at 0.04 bin space from the 4128 pixels. The red line shows the fitting curve based on the maximum likelihood method.

It should be noted that even the water ratio in a shoreline pixel is zero, there is a small probability that this pixel may be mistaken as a water pixel, because the surface reflectance information may be contaminated by adjacent water pixels. Therefore, the classifier has a small value ( $\sim 0.02$ ) when the water ratio is zero. As can be seen from Figure 9 (b), As shown in Figure 9 (c), when the water ratio is larger than 0.3, the probability of the pixel classified as water increases with is close to 1. the water area ratio in the pixel, which is expected. The enclosed area of the fitting curve ( $y = x^{1.43}$ ) is smaller than that of  $y = x$  on  $[0, 1]$ .



This~~which~~ suggests that there may be a ~~low~~higher probability of the occurrence of ~~water~~water pixels ~~t~~that is associated with a systematic bias of the lake shoreline detection. Note that the systematic bias can be removed when linearly fitting the lake shore changes and altimetry-derived water levels as long as the bias is stable. Therefore, uncertainty in optical water levels developed in this study arises from the variation in this systematic bias.

- 5 To describe the variation in the systematic bias, a new random variable  $X$  was introduced to represent the bias between the classified water area and the real water area in a shoreline pixel. Given the shape and position of the shoreline, the real water area in each shoreline pixel is a complex function of the relative position between the pixel and the shoreline. To simplify the derivation, we assumed that the water area ratio in a shoreline pixel is uniformly distributed on  $[0,1]$ , meaning that the probability of any value between 0 and 1 is equal. If we use  $X_0$  to represent the true water area ratio in the shoreline pixel and
- 10  $X_1$  to represent the classified results based on the water ratio, the random variable  $X$  can be expressed as:

$$X = X_1 - X_0 \quad \text{Eq 5}$$

where  $X_1$  can take on 0 or 1 (i.e., the classified results only tell us whether a pixel is water pixel or not), so  $X$  can only take on either  $-X_0$  or  $1-X_0$ . Because the range of  $X_0$  is  $[0,1]$ , it is obvious that the range of  $X$  is  $[-1,1]$ . A derivation of  $F(X)$ , i.e., the probability density function (PDF) of  $X$  is given as follows:

$$F(X) = \begin{cases} P(X = -X_0|X_0) \cdot P(X_0), & X < 0 \\ P(X_0 = 0, X_1 = 0) + P(X_0 = 1, X_1 = 1), & X = 0 \\ P(X = 1 - X_0|X_0) \cdot P(X_0), & X > 0 \end{cases} \quad \text{Eq 6}$$

$$P(X = -X_0|X_0) = P(X_1 = 0|X_0) = 1 - f(X_0) = 1 - f(-X) \quad \text{Eq 7}$$

$$P(X = 1 - X_0|X_0) = P(X_1 = 1|X_0) = f(X_0) = f(1 - X) \quad \text{Eq 8}$$

where  $f(x)$  is referred to as the classifier function defined in ~~Eq 4~~Eq-5.

- 15 Because  $X_0$  is uniformly distributed between  $[0,1]$ ,  $P(X_0) = 1$ . ~~Note that  $P(X_0 = 1, X_1 = 1) = 1$ , this means that if  $X_0$  is 1, the probability of a pixel classified as water is 1. However,  $P(X_0 = 0, X_1 = 0)$  is not necessarily 1 (i.e.,  $1 - f(0)$ ), because the pixel with  $X_0 = 0$  still has a low probability, i.e.,  $f(0)$  of being classified as water based on the illustration above.~~ Combining Eqs.(7)–(9) with the explanations on the specific case  $X = 0$  results in the following:

$$F(X) = \begin{cases} 1 - f(-X), & X < 0 \\ 1 + 1 - f(0), & X = 0 \\ f(1 - X), & X > 0 \end{cases} = \begin{cases} 1 - f(-X), & X < 0 \\ 2 - f(0), & X = 0 \\ f(1 - X), & X > 0 \end{cases} \quad \text{Eq 9}$$

It is obvious that  $F(X)$  is not a continuous function, but it can be integrated and the integral of  $F(X)$  on  $[-1,1]$  equals 1, meaning that it satisfies the basic property of PDF.

Overall,  $F(X)$  describes how the systematic bias between the classified water ratio and real water ratio in shoreline pixels is distributed as shown in [Figure 10](#)~~Figure 10~~. If there are  $N$  shoreline pixels in an ROI, we can take them as  $N$  independent

5 observations of  $X$  and calculate the mean value  $\bar{X}$ . This value  $\bar{X}$  can represent an average shift of the detected lake shoreline from the real lake shoreline in the unit of one-pixel width (30 m). As we mentioned above, the systematic bias can be removed in the regression between lake shore changes from optical remote sensing and the corresponding water levels from satellite altimetry. As such, it is the variation of the bias that determines the accuracy of the optical water levels. Therefore, we can calculate the standard variation of  $\bar{X}$  to represent the uncertainty in lake shoreline changes. Note that there is a simple

10 relationship between  $\sigma_{\bar{X}}$  and  $\sigma_x$ :

$$\sigma_{\bar{X}} = \frac{\sigma_x}{\sqrt{N}} \quad \text{Eq 10}$$

One only needs to calculate  $\sigma_x$ :

$$\bar{X} = \int_{-1}^1 F(X) \cdot X dX \approx -0.09\del{0.346} \quad \text{Eq 11}$$

$$\sigma_x = \sqrt{\int_{-1}^1 F(X) \cdot (X - \bar{X})^2 dX} \approx -0.39\del{2.999} \approx 0.300 \quad \text{Eq 12}$$

[Eq 12](#)~~Eq 13~~ in combinaions with [Eq 4](#)~~Eq 5~~, [Eq 9](#)~~Eq 10~~, and [Eq 11](#)~~Eq 12~~ was resolved numarically, resulng in  $\sim 0.39\del{3}$  pixel width. Substituting  $\sigma_x$  in [Eq 10](#)~~Eq 11~~ with [Eq 12](#)~~Eq 13~~ gives:

$$\sigma_{\bar{X}} = \frac{0.39}{\sqrt{N}} \quad \text{Eq 13}$$



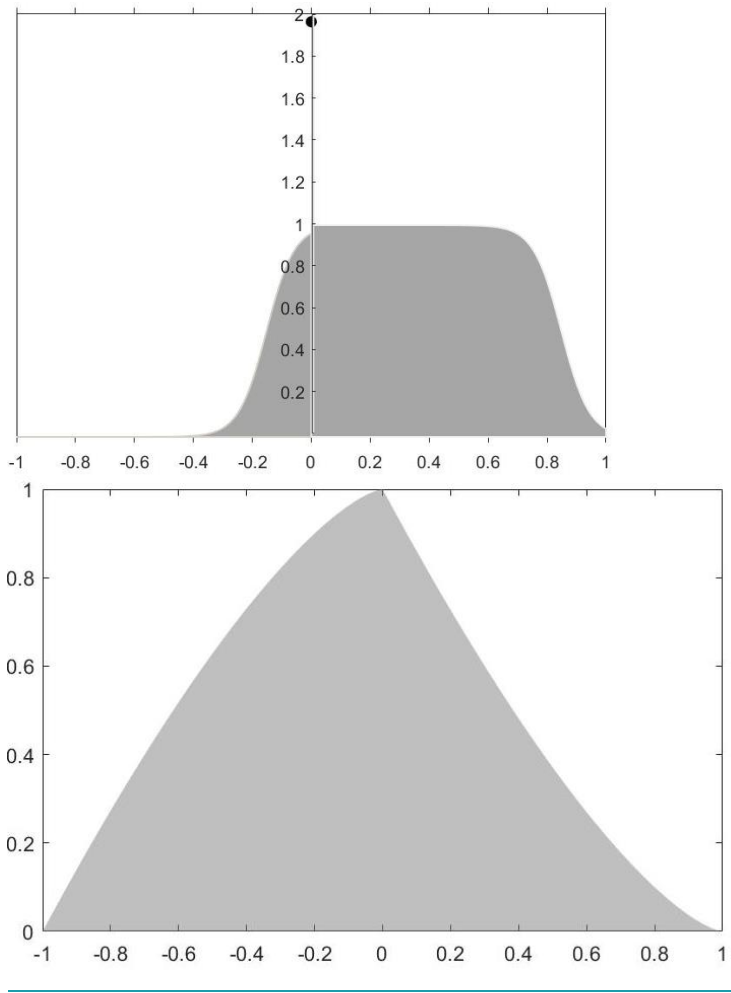

**Figure 10. Probability density function of the systematic bias  $X$  between the classified water ratio ( $X_1$ ) and real water ratio ( $X_0$ ) in a shoreline pixel.**

- 5 If the slope of the shoreline is known, e.g.,  $\tan\theta$ , the uncertainty of the optical water level can be expressed as:

$$\sigma_{ho} = \sigma_{\bar{x}} \cdot d \cdot \tan\theta = \frac{0.39 \times 30 \times \tan\theta}{\sqrt{N}} \quad \text{Eq 14}$$

where  $\sigma_{ho}$  is the uncertainty of optical water levels and  $d$  is the spatial resolution of the satellite image (30 m). In this study, a typical width of ROI for deriving optical water levels is ~10-pixel width, meaning that  $N$  is ~10. In addition, lake shores used for generating optical water levels here generally have a relatively mild slope of ~1/30 or even smaller, which can be roughly estimated from the maximum shoreline change and altimetry water level change within a year. Here if we use 1/30 as the slope  $\tan\theta$ , the uncertainty of the optical water levels can ultimately be estimated to be ~0.12 m, which is very close to the RMSE (0.11~0.09 m) based on the comparison of the optical water levels and in situ water level measurements mentioned earlier.

However, for most cases we do not know the exact ~~real~~ lake bank slope  $\tan\theta$ , which is the reason why we performed the regression analysis between lake shore changes and altimetry water levels. Information on the real lake bank slope is implicitly expressed in the linear fitting slope  $\beta$  (if the fitting line is  $y=\beta x+ \alpha$ ). ~~The u~~Uncertainty in ~~of~~ altimetry information will evolve into the fitting parameters  ~~$\beta$~~  and impact the accuracy of the generated optical water levels. Given that the observed lake shoreline change is  $X_I$  (same as Eq 5Eq 5), the optical water level ( $y$ ) can be expressed as:

$$y = \beta(X_1 - \bar{X}_1) + \bar{Y} = \beta(X_0 - \bar{X}_0) + \beta(X - \bar{X}) + \bar{Y} \quad \text{Eq 15}$$

Where  $(X_1 - \bar{X}_1)$  denotes the observed lake shoreline changes (in the unit of a Landsat pixel),  $\bar{Y}$  denotes the mean altimetry water level used for linear regression,  $(X_0 - \bar{X}_0)$  denotes the real lake shoreline changes,  $(X - \bar{X})$  denotes the variation of the optical shoreline position caused by the water extraction method, and  $\beta$  is the linear fitting slope. It is obvious that the expected value  $(X - \bar{X})$  is 0. ~~as~~As we discussed before, a systematic bias ~~will not~~ does not affect the accuracy of the optical water level, but the variation of the systematic bias ~~will~~does.

Based on Eq 15Eq 15, the overall uncertainty of optical water level  $\sigma_y$  can be given as:

$$\sigma_y = \sqrt{\sigma_\beta^2(X_{01} - \bar{X}_{01})^2 + \sigma_{\bar{x}}^2\beta^2 + \sigma_{\bar{Y}}^2\sigma_{\bar{x}}^2} \quad \text{Eq 16}$$

Where  $\beta$  and  $\sigma_\beta$  can be derived ~~given~~ from the linear regression analysis,  $\sigma_{\bar{x}}$  is given in Eq 13Eq 13,  $\sigma_{\bar{Y}}$  is the uncertainty of the mean altimetry water level which can be calculated from the altimetry data. For a typical lake like Yamzhog Yumco,  $\beta = 0.35$ ,  $\sigma_\beta = 0.02$ ,  $\text{Max}(|X_1 - \bar{X}_1|) = 11$ ,  $\sigma_{\bar{x}} = 0.13$ ,  $\sigma_{\bar{Y}} = 0.015$  m, which gives a maximum  $\sigma_y$  of 0.22 m. This relationship ~~showed~~ that the uncertainty of the optical water level will increase with the distance from the center point  $(\bar{X}_{10}, \bar{Y})$  represented by  $(X_1 - \bar{X}_1)^2$ . The interpretation of this phenomenon is that extrapolation of optical water levels (far from the center point) may cause some artefacts and should be used with caution. More detailed discussion on the extrapolation can be found in the supplementary file.

Overall, the uncertainty quantification of the optical water levels developed in this study indicates clearly that the accuracy of optical water levels depends on the width of an ROI, e.g., the number of pixels/observations, slope of the lake shore, the effectiveness of the water classification method, and the uncertainty in altimetry water level used for regression. One of the advantages of the optical water level is that an ROI does not necessarily cover a large area of lake shores, which maximizes the potential of optical remote sensing images to increase the spatial coverage and temporal resolution of lake water level estimates that may not, however, be achievable by using satellite altimetry alone. Optical remote sensing images provide

important complementary information on altimetry-derived water levels and would subsequently facilitate lake water storage estimation.

4.3 Cross validation with similar products

We made a comparison with We compared our product with a widely used lake water level/storage data set provided by the LEOGS Hydroweb, indicating that our product may perform better in terms of the consistency as well as sampling frequency. Both advantages are important in improving our understanding of responses of lakes to climate change. There are 21 same lakes in both our study and LEOGS Hydroweb. Annual trends in water level and lake storage during 2003–2015 were compared (Figure 11Figure 14). Overall, the two products are consistent in terms of  $R^2$  of the linear fit.

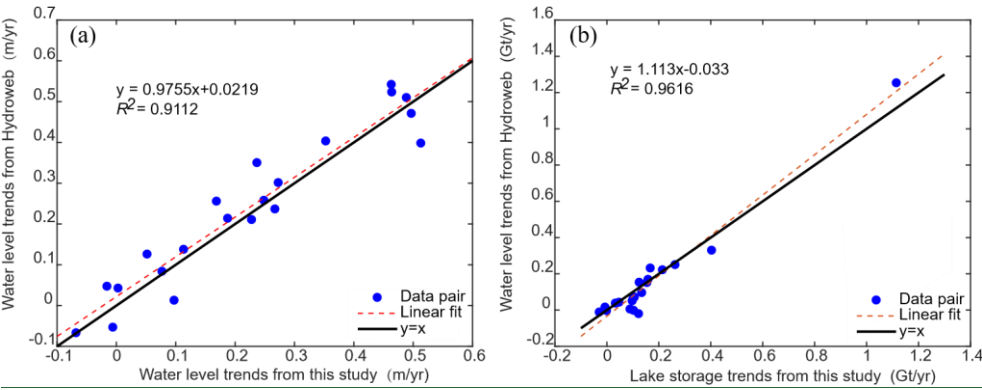

Figure 1144. Cross validation of the TP lake level and storage changes derived from our study with those provided by the LEGOS Hydroweb database (Crétaux et al., 2011a): (a) trends in lake water levels from 2003 to 2015 and (b) trends in lake water storage from 2003 to 2015.

5 Dataset description and availability

The derived TP lake water levels, hypsometric curves, and water storage changes are archived and available at <https://doi.org/10.1594/PANGAEA.898411>. (Li et al., 2019). The dataset covers large 52 large lakes (50 lakes with a surface area larger than 150 km<sup>2</sup>, and 2 lakes are 100~150 km<sup>2</sup>) on the Tibetan Plateau. The dataset consists of two parts: (1) a table containing hypsometric curves and corresponding regression statistics ( $R^2$  and number of data pairs) for each lake, with parameters of the hypsometric curve listed in separate columns for the convenience of batch processing; (2) time series for each lake archived as 52 entities with geological information (i.e., latitude, longitude, and size of the lake) that can be looked up in an online map provided by PANGAEA, avoiding the confusion of lake names. The time series of each lake include lake water levels and lake storage changes. For data points in the water level time series, sensor type was shown (i.e., from Jason-1/2/3, Envisat, ICESat, CryoSat, or optical images). Uncertainty was calculated using the standard deviation of valid footprints in the cycle (only for altimetry data). The lake water storage time series were transformed from water level time series using

the hypsometric relationship so that they have equal data volume. The lake water storage time series represent changes in lake storage with respect to a reference water level, which is listed in the corresponding hypsometric curve table as a parameter. The overall uncertainty of optical water levels within the regression range (the range of altimetry water levels) is 0.1–0.2 meters-m based on the experiment and analysis of this paper, the extrapolation of optical water levels may occur during the time gap between altimetry missions and before 2002. The average uncertainty of altimetry water levels is 0.11 m.

## 6 Applications

### 6.1 Spatiotemporal analysis of changes in Tibetan Lakes

Based on the lake water storage changes we derived, spatial patterns of lake storage trends from 2000 to 2017 were shown in Figure 12Figure 14. In the endorheic basin of the TP, similar to some reported results (Yao et al., 2018b; Zhang et al., 2017a), most lakes have been expanding rapidly, e.g., Lake Selin Co (89.00 E, 31.80 N) gained  $\sim 19 \text{ km}^3$  of water during the study period, Lake Kusai (92.90 E, 35.70 N) experienced an abrupt expansion due to flood and gained  $\sim 2.2 \text{ km}^3$  of water in 2011, as reported in related work (Xiaojun et al., 2012). In contrast, some lakes in the southern part of the TP experienced shrinkage, e.g., Lake Yamzhog Yumco (90.70 E, 28.93 N) gained a total of  $\sim 0.8 \text{ km}^3$  water during 2000–2004 but has been shrinking during the remaining 13 years (2005–2017) at a rate of  $\sim -0.2 \text{ km}^3/\text{yr}$ . In contrast to Lake Yamzhog Yumco, Lake Qinghai (100.00 E, 36.90 N) lost  $\sim 1.9 \text{ km}^3$  water during 2000–2004 but gained  $\sim 8.1 \text{ km}^3$  of water during 2005–2017. Similar patterns can be detected in adjacent lakes of Lake Qinghai, e.g., Lake Donggei Cuona (98.55 E, 35.28 N) and Lake Ngoring (97.70 E, 34.90 N).

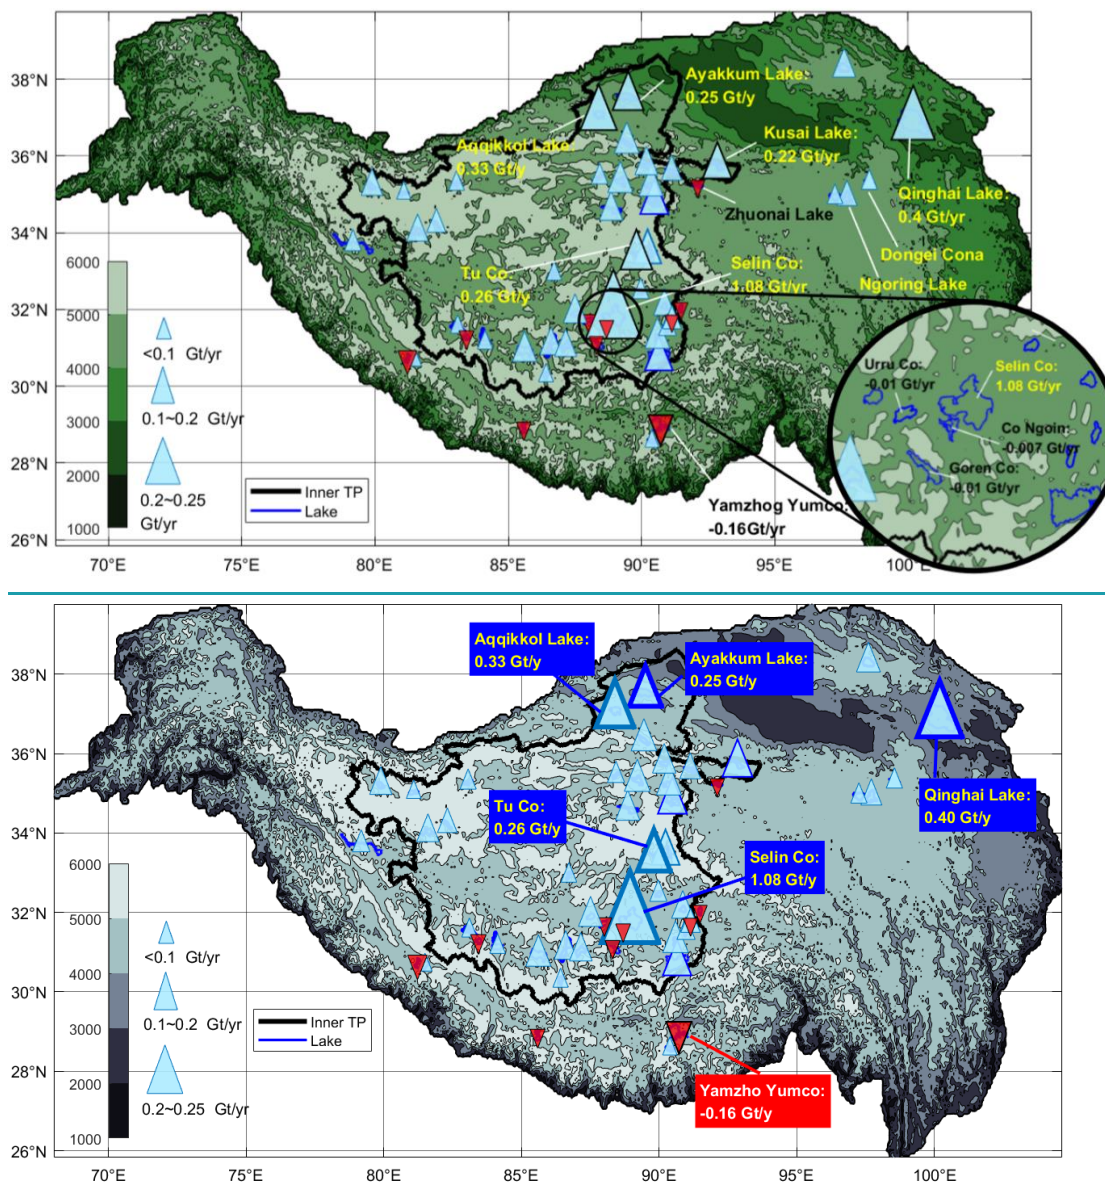

**Figure 12-14.** Spatial distribution of trends in lake storage on the TP during 2000–2017. The back polygon shows the boundary of the endorheic basin of the TP including 39 study lakes. The other 13 study lakes are located outside the endorheic basin.

- 5 However, spatial proximity cannot fully explain the intricate trend distribution in the Selin Co basin, where large lakes such as Lake Selin Co were expanding whereas smaller adjacent lakes showed an opposite decreasing trend, e.g., Lake Urru (88.00 E, 31.70 N), Lake Co Ngoin (88.77 E, 31.60 N), and Lake Goren Co (88.37 E, 31.10 N). In fact, we found that the decreasing trends in some small lakes like Lake Goren Co were not detected in Yao et al. (2018b), which is likely due to the lower sampling frequency as shown in [Figure 13](#)[Figure 12](#). The three shrinking lakes are located in the upstream region and feed

Lake Selin Co through two small rivers. One of the rivers links Lakes Goren Co, Urru, and Selin Co, whereas the other links Lakes Co Ngoin and Selin Co.

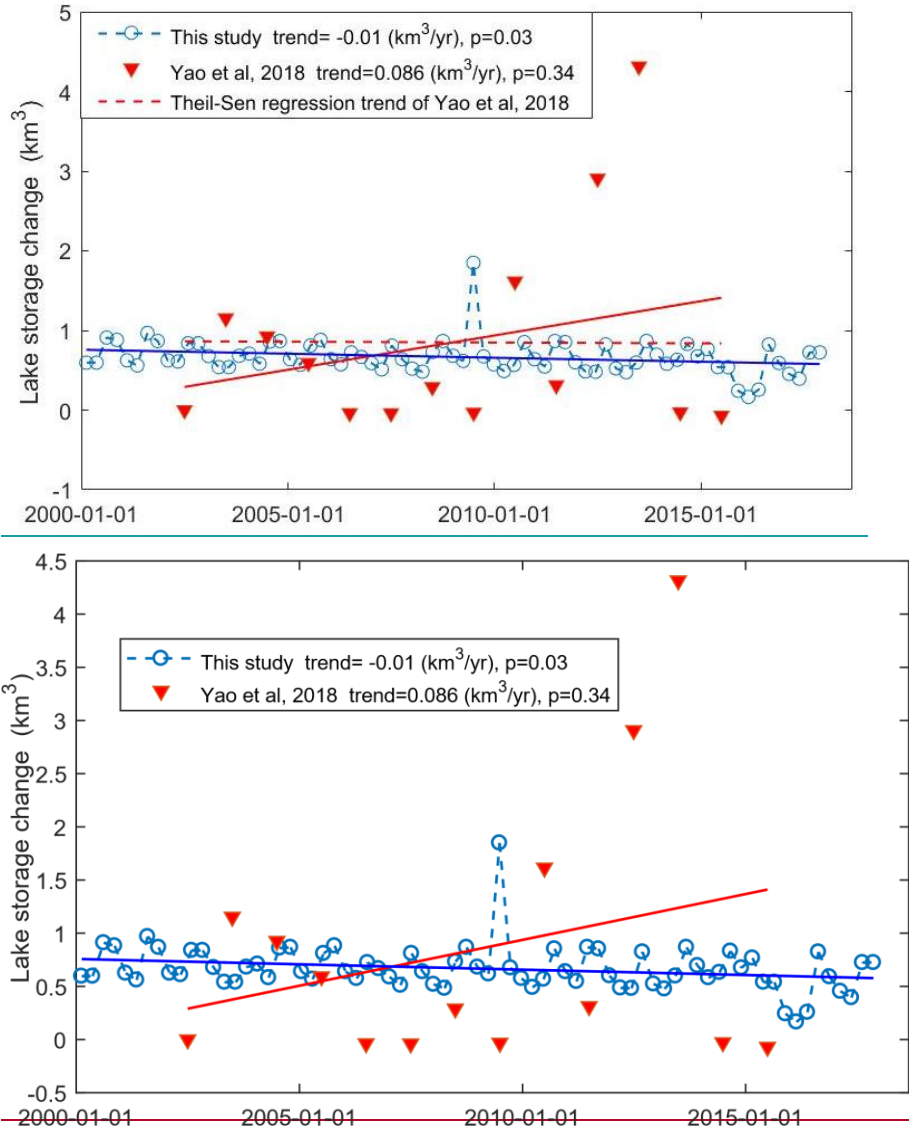

5 **Figure 1342. Discrepancy of lake storage trends in Lake Goren Co between Yao et al. (2018a) and our study.**

A possible explanation of the disparity of changes in lake water storage in the Selin Co basin could be the principle of minimum potential energy. If we simplify the basin with the tank model and take the upstream small lake as a tank with a leaking hole, the storage of the small lake is mainly controlled by the height of the leaking hole. Given that surface water of the small lake increased, most of the increased water would flow into the large lake (a lower tank), and the outflow discharge of the small lake at higher elevations would increase accordingly. The height of the leaking hole would decline (erosion) so as to increase

10 the overflow capacity, which eventually results in the decrease in small lake storage. Another possible situation is that the



height of the leaking hole remains the same and the water surface height of the small lake increases, but this situation is not consistent with the minimum potential energy principle, as more water potential energy is stored in the small lake. This phenomenon shows that river-lake interactions may cause complex patterns of the regional surface water distribution. Therefore, decreases in small lake water storage and increases in water storage of Lake Selin Co in the basin detected by our study seem reasonable. Increases in small lake water storage in this basin reported in some published studies may be associated with the sparse sampling of lake water levels.

We averaged the total lake water storage change in each season to generate the time series shown in [Figure 14](#)~~Figure-13~~ (a). The overall storage change in the 52 study lakes is  $98.3 \pm 2.1 \text{ km}^3$ . The total lake water storage was increasing rapidly during the first 12 years but became relatively stable since 2012.

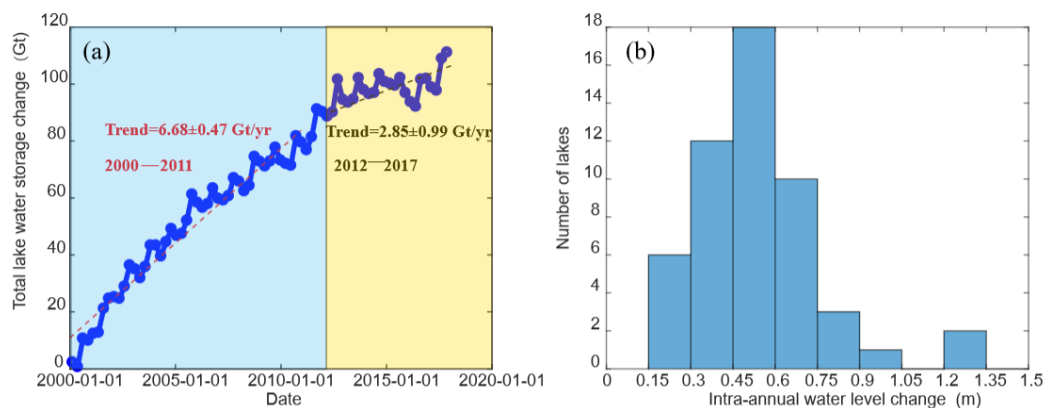

**Figure 1413.** (a) Total storage changes in the study lakes (52) on the TP, which can be generally divided into two stages: (1) a rapidly increasing stage (2000–2011) with a higher increasing rate of  $6.68 \text{ km}^3/\text{yr}$  and (2) a mildly increasing stage (2012–2017) with an increasing rate of  $2.85 \text{ km}^3/\text{yr}$ . (b) Histogram of changes in lake water levels of the study lakes on the TP.

Intra-annual variation in the TP lakes can also be investigated using the densified time series generated by this study. We removed the linear trend (sometimes there were multiple linear trends for a lake in different periods, which were removed in a stepwise fashion) and calculated the mean monthly water level anomaly for each lake across the study period. Then the intra-annual water level change was represented by the difference between the maximum and minimum values of the monthly water level anomaly. The histogram of the intra-annual water level change in [Figure 14](#)~~Figure-13~~ (b) shows that most of the TP lakes have water level variations ranging from 0.3–0.75 m in a year on average. Similar work was performed by Lei et al. (2017) but only a small number of lakes were investigated in their study.

## 6.2 Quality assessment of similar data products

~~We made a comparison with a widely used lake water level/storage data set provided by the LEOGS Hydroweb, indicating that our product may perform better in terms of the consistency as well as sampling frequency. Both advantages are important in improving our understanding of responses of lakes to climate change. There are 21 same~~

lakes in both our study and LEOGS Hydroweb. Annual trends in water level and lake storage during 2003–2015 were compared (Figure 14). Overall, the two products are consistent in terms of  $R^2$  of the linear fit.

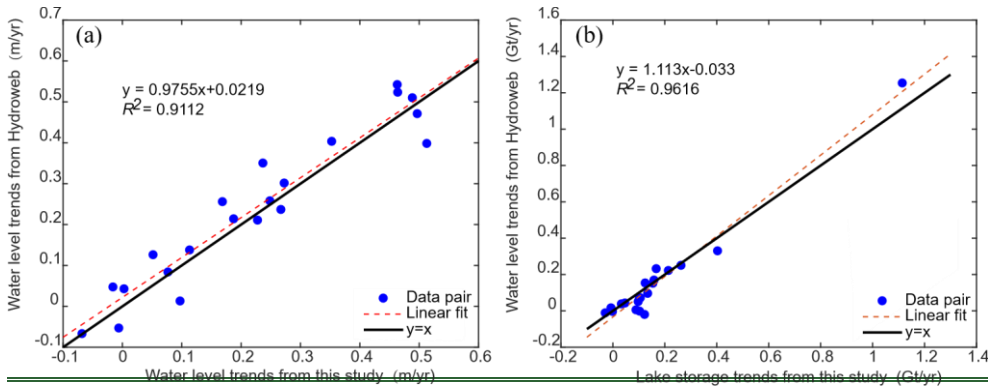

**Figure 14. Cross validation of the TP lake level and storage changes derived from our study with those provided by the LEOGS Hydroweb database (Crétaux et al., 2011a): (a) trends in lake water levels from 2003 to 2015 and (b) trends in lake water storage from 2003 to 2015.**

We first compared our product with the widely used global dataset Hydroweb in several TP lakes.

However, some obvious discrepancies between the two data sources can be noticed still exist, e.g., water levels of Lake Taro Co. Both Hydroweb data and our estimation used ICESat-1 and ICESat and CryoSat-2 data. The difference lies in the fact that our CryoSat-2 product was more updated with a longer time span but Hydroweb used an additional altimetry satellite SARAL. Since both products were performed some kind of removal of the systematic bias, it is possible that we chose different baselines that resulted in the overall shift as shown in Figure 15. For instance, we may use different sets of ellipsoid and geoid models. However, in addition to the overall shift, some time-dependent discrepancy can be found in Figure 15, e.g., periods highlighted by red or blue shades. We will explain the possible reasons in the following paragraph.

The black curve shows the optical water level we derived, which is a critical reference when connecting two different altimetry data time series without an overlap period. The optical water level shows that the last two samples of ICESat-1 data should not be lower than the first few samples of the CryoSat-2/SARAL data (see the dashed boxes). However, it is apparent that Hydroweb data display a reverse relationship, which shows that the last two ICESat measurements are smaller than the first a few CryoSat/Saral measurements. It is possibly due to an unremoved systematic bias between ICESat and CryoSat/Saral time series from Hydroweb data in Taro Co. It should be noted that, even though the optical water levels were derived by linearly fitting lake shoreline changes with altimetry data, the relative height of water levels during different periods should not be affected by the fitting parameters, e.g., if optical water levels show that  $H_a \geq H_b$ , where  $H_a$  ( $H_b$ ) means water level acquired in period A (B), the  $H_a \geq H_b$  relationship will not change with the fitting parameters used to generate the optical water level. This is the main reason for us to use optical water levels as reference data. Therefore, Hydroweb data may underestimate or overestimate the increasing/decreasing trends in the water levels of Lake Taro Co. since 2009 as their ICESat data are ~0.3 m



[lower than the expected value](#). This problem may also exist in some similar studies when multisource altimetry data without overlap periods were used.

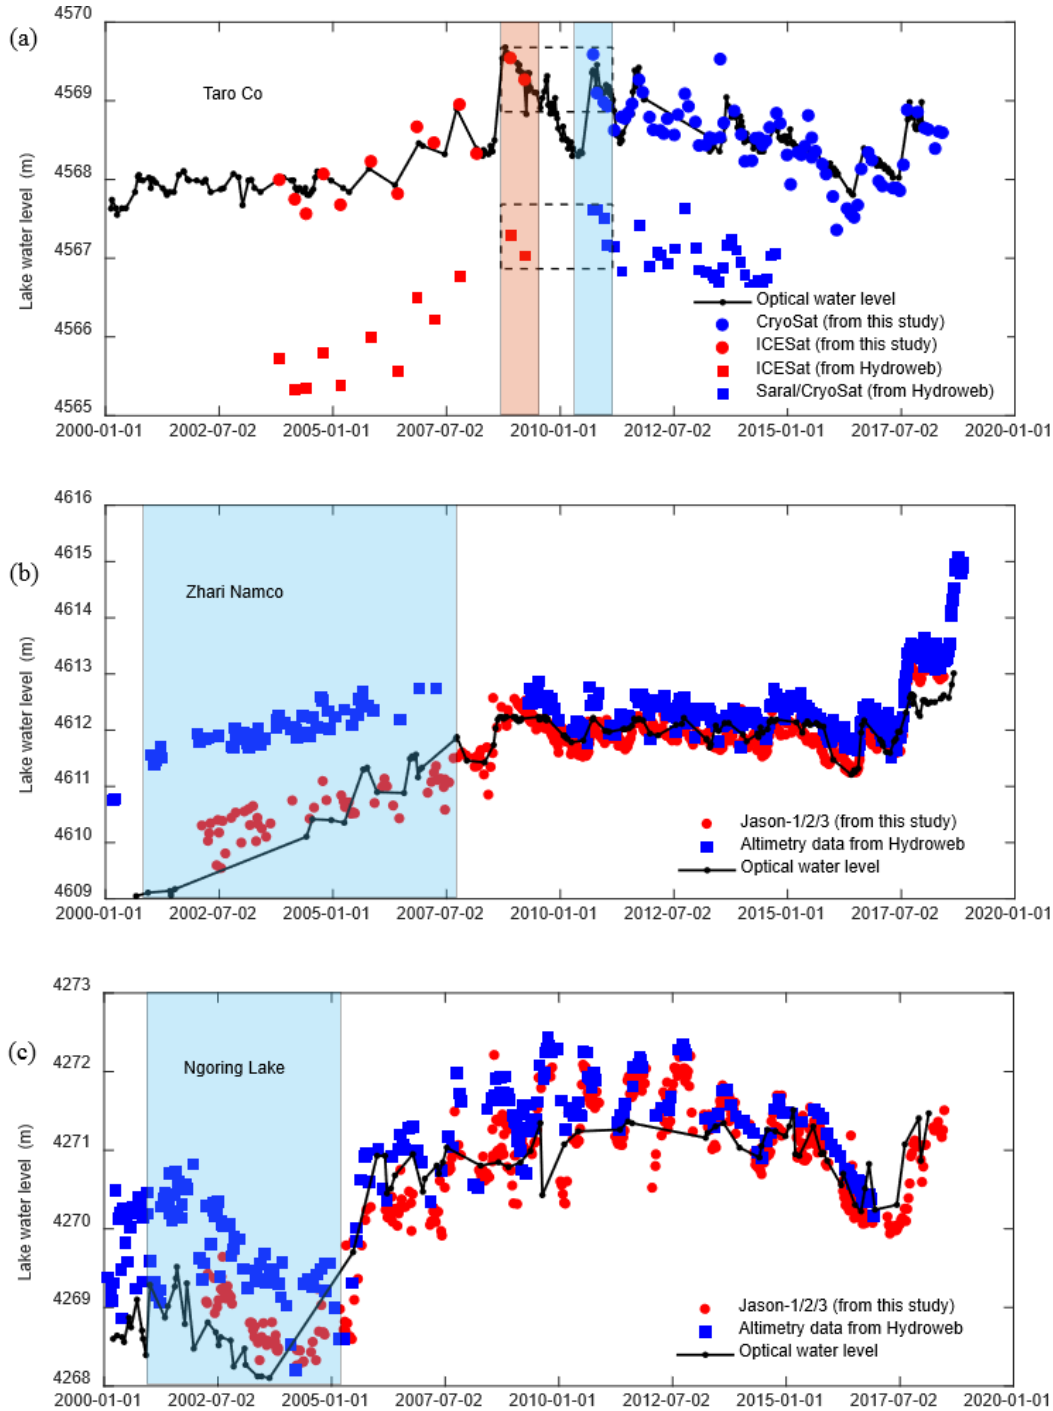

**Figure 15. Similarities and differences between water level time series from the LEGOS Hydroweb database and this study (Crétau et al., 2011a). (a) Lake Taro Co (84.12 E, 31.14 N); (b) Lake Zhari Namco (85.61 E, 30.93 N); and (c) Ngoring Lake (97.70 E, 34.90 N).**

As shown in [Figure 16](#)~~Figure 16~~, optical data can be less noisy than altimetry data in certain lakes and significantly improved the continuity of lake monitoring. In addition, a more apparent seasonality in lake change can also be seen from the densified lake level time series. These advantages would largely benefit a better understanding of responses of TP lakes to climate change and facilitate hydrological modelling of lake basins, regional water balance analysis, and even hydrodynamic analysis of lake water bodies.

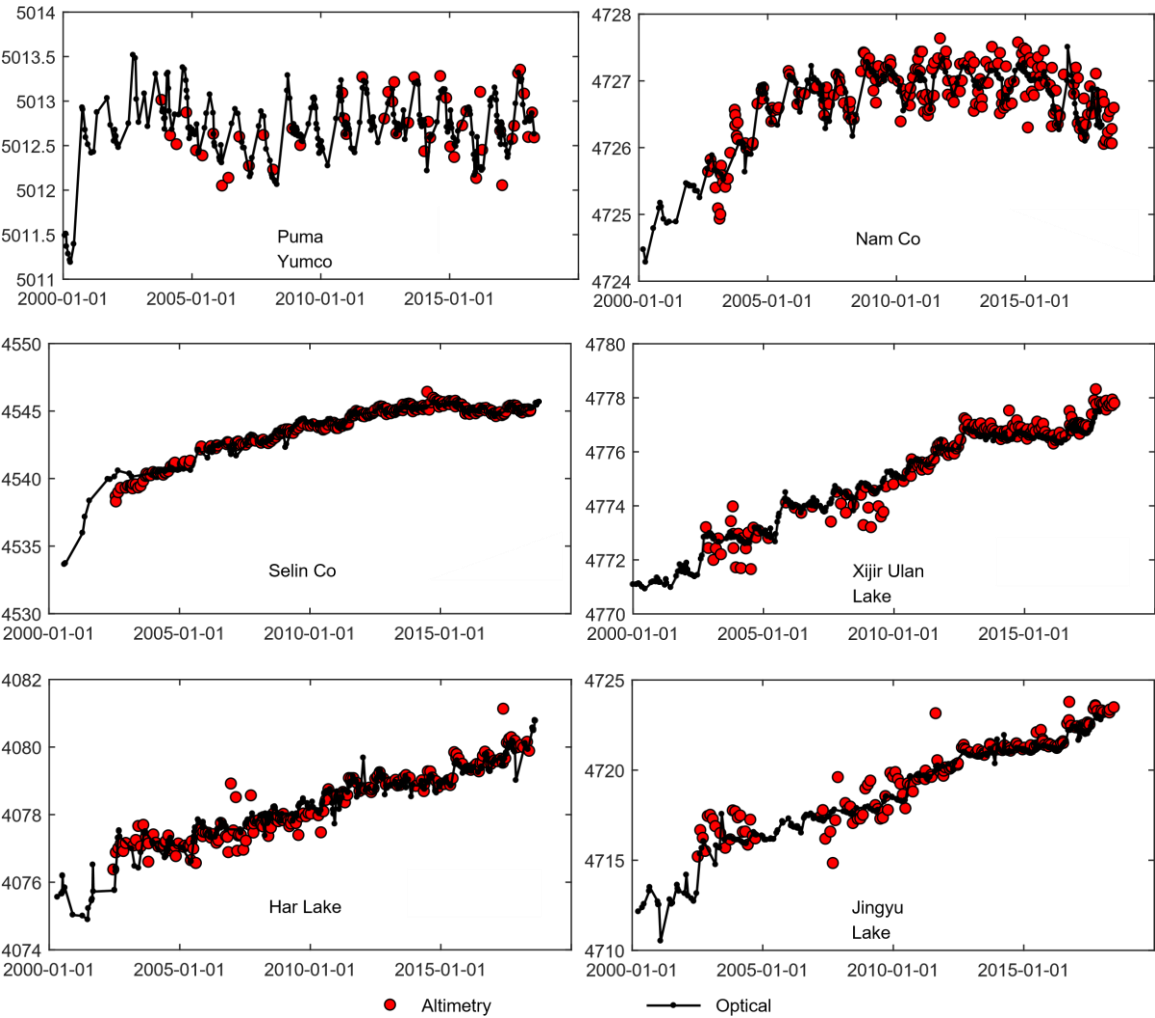

**Figure 16. Lake water level (left y axis) estimates from our approach for six TP lakes. Black lines represent optical data and red dots represent Altimetry data.**

### 6.3 Lake overflow flood monitoring

As mentioned earlier in Section 5.1, Lake Kusai experienced an abrupt expansion in 2011, resulting from dike-break of an upstream lake (Hwang et al., 2019; Liu et al., 2016; Xiaojun et al., 2012), named Lake Zhuonai (91.93 E, 35.54 N). The outburst of Lake Zhuonai occurred on Sep 14 (Liu et al., 2016) and ~2.4 km<sup>3</sup> of water leaked into the Kusai River (as shown in Figure 17 (b)), the main inflow of Lake Kusai. The water level of Lake Kusai increased by up to ~8 m within 20 days (from Sep 11 to Oct 1 in 2011) based on Jason-2 data, and then started to drop as water overflowed from the southeast corner into Lake Haidingnuoer (93.16 E, 35.55 N) and Lake Salt (93.40 E, 35.52 N). Lake Salt, the lowest part of the basin close to the basin boundary, has gained ~3.2 km<sup>3</sup> of water since 2011 and became a critical threat to the surrounding residents and railway ~10 km southeast to the boundary. Note that there are few satellite altimetry data available for Lake Salt except several CryoSat-2 observations, where optical water levels can provide a near real-time monitoring of changes in lake water level and storage that are crucial to flood early warning and risk management.

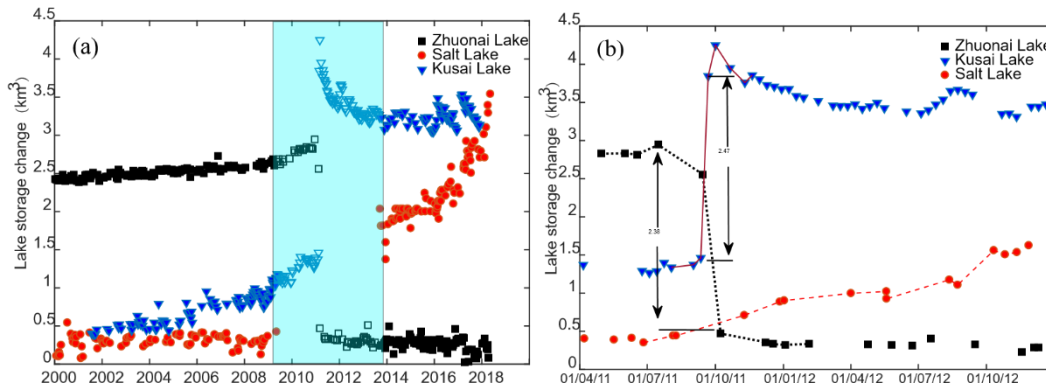

**Figure 17. (a) Lake storage changes in Lake Zhuonai, Lake Kusai, and Lake Salt corresponding to the outburst event in Sep 2011 and (b) storage changes in relevant lakes during the outburst event.**

Aided by the densified water level series, it was possible to estimate the height of the outlet of Lake Kusai, an important parameter for overflow estimation. The overflow of Lake Kusai can help predict the water level rise in Lake Salt and even serve as an indicator of flood forecast, as Jason-3 data with a 10-day revisit cycle are now available on Lake Kusai. Several pairs of concurrent same period Landsat OLI images and lake water levels were compared to provide a range of possible outlet heights, which are likely to be 4483.9 m to 4484.1 m, as shown in Figure 18 (a). Then we measured the mean width of the outlet from high resolution optical images provided by Planet Explorer (Team, 2017), which is relatively stable in Dec at 31.5±2.3 m in recent years.

Given lake water levels, the outlet height and width, estimation of overflow can be made using the broad crest weir formula:

$$Q = C \cdot b \cdot H^{1.5} \sqrt{2g} \quad \text{Eq. 17-16}$$

where  $C$  is a parameter mainly reflecting geometric characteristics of the weir that mainly varies from 0.3–0.4,  $b$  is the width of the weir,  $H$  is the water head with respect to the top of the weir, and  $g$  is the acceleration of gravity.

We determined  $C$  (~0.3) by using stage 1 shown in the Figure 19 as a calibration period. Details can be found in the supplementary file. Then we applied this result to stage 2 shown in Figure 19 to estimate the total overflow from Lake Kusai and compared the overflow with total water gain in stage 2 in Lake Salt. Since Lake Salt mainly relied on the replenishment of Lake Kusai during that period, with little precipitation input and negligible glacier melt water in winter, the outflow of Lake Kusai can be comparable with the water gain in Lake Salt derived from remote sensing, though there was a small amount of evaporation loss. This relationship can provide a straightforward validation of our developed method. However, it was not available in stage 1, because the outflow of Lake Kusai first replenished Lake Haidingnuoer until the later began overflowing. The total outflow from Lake Kusai in stage 2 was calculated to be 0.21–0.22 km<sup>3</sup>, whereas the water gain in Lake Salt was 0.19 km<sup>3</sup>. This result showed that our densified lake water level time series from multiple optical and altimetric missions and the developed method are valuable in monitoring and predicting the outflow flood risk that is crucial for the safety of downstream residents and infrastructure.

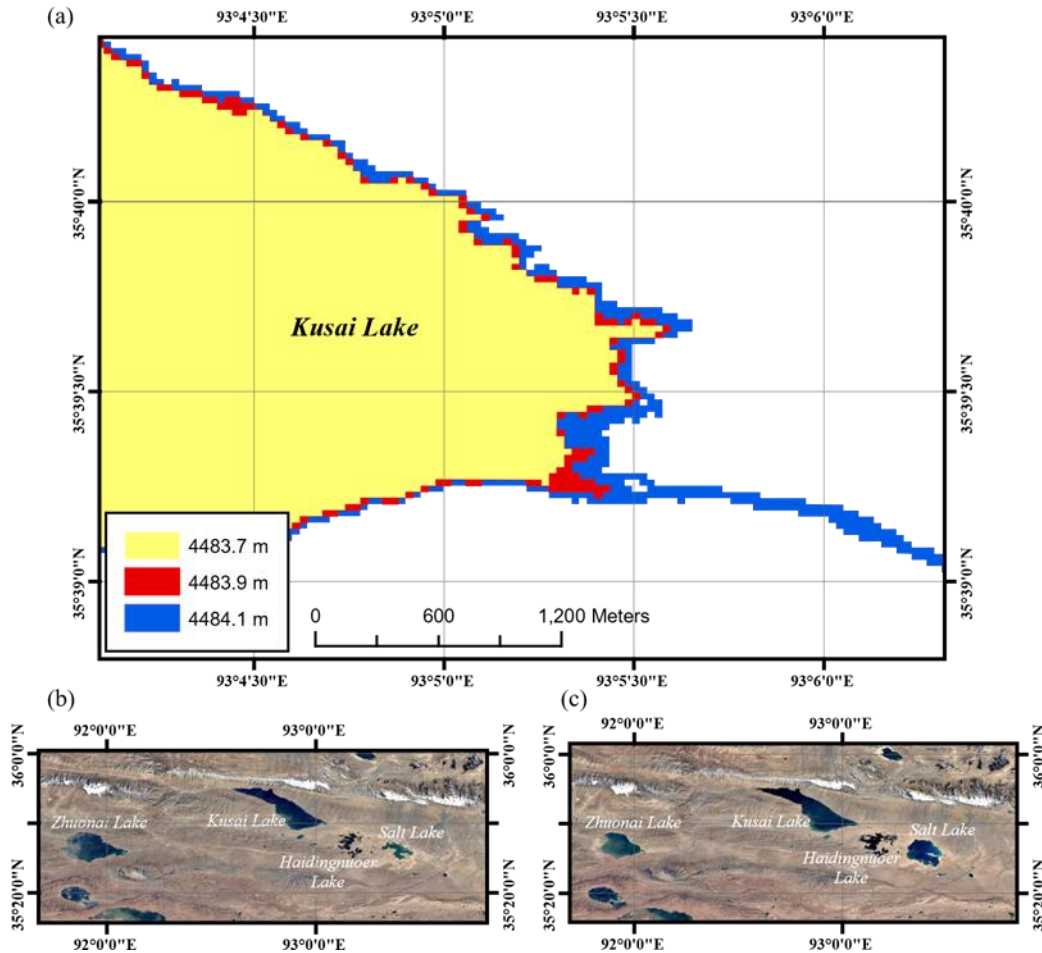

Figure 18. (a) Height variations in the outlet of Lake Kusai, the overflow would occur when the water level increases from 4483.9 m to 4484.1 m; (b) [Landsat images](#)[Google Earth image](#) before the outburst of Lake Zhuonai (2010/12); and (c) [Google Earth image](#)[Landsat images](#) after the outburst event (2013/12).

Given lake water levels, the outlet height and width, estimation of overflow can be made using the broad crest weir formula:

$$Q = C \cdot b \cdot H^{1.5} \sqrt{2g} \quad \text{Eq 16}$$

where  $C$  is a parameter mainly reflecting geometric characteristics of the weir that mainly varies from 0.3–0.4,  $b$  is the width of the weir,  $H$  is the water head with respect to the top of the weir, and  $g$  is the acceleration of gravity.

It is difficult to obtain the exact value of  $C$  without performing field investigations. Nevertheless, the range of  $C$  can be narrowed down by investigating the lake storage change process of Lake Kusai. As shown in Figure 19 (a), from Oct 1 to Nov 9 in 2011, the water level of Lake Kusai decreased rapidly by ~1.2 m. Given that the rainy season has ended (Liu et al., 2016), the water level of Lake Zhuonai became stabilized, providing minimum inflow to Lake Kusai. Meanwhile, the magnitude of total evaporation during the period would not exceed 0.1–0.2 m as the mean annual potential evaporation of the region is around 1000 mm (Zhang et al., 2007) and stage 1 (shown in Figure 19) only lasted for 40 days. In addition, the evaporation loss could be partially compensated by inflow. Overflow should be the driving factor of the lake storage balance of Lake Kusai during the period. Therefore, we used the following function to reproduce changes in water level and storage in Lake Kusai during Oct 1 to Nov 9 in 2011 (stage 1 shown in Figure 19):

$$-\frac{dV(H)}{dt} = Q = C \cdot b \cdot H^{1.5} \sqrt{2g} \quad \text{Eq 17}$$

where  $V$  is referred to as the lake storage change, which is a function of water head  $H$ .

Equation 17 can be theoretically solved to describe the relationship between  $H$  and  $t$  if  $V(H)$  is simple, e.g., a cubic curve. Otherwise, it can be solved with a numeric algorithm, such as the finite difference method. In a word, by solving the equation with different values of parameter  $C$  and optimizing the mean absolute error between the simulated result and the remotely sensed observations (shown in Figure 19 (a)), we suggested that  $C$  equals to 0.30 in this case, which is a reasonable value in hydrodynamic calculations.

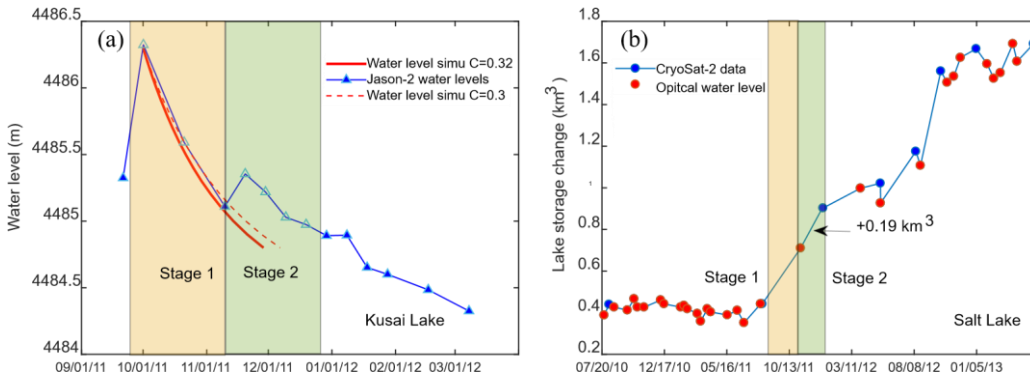

Figure 19. (a) Changes in the water level of Lake Kusai after receiving the outburst flood from Lake Zhuonai. Water level in stage 1 was simulated using Eq 17, which provided a referencing range of parameter  $C$ . Water level in stage 2 provided water level input for Eq 17 to calculate total outflow, which was compared with the concurrent same period water gain of Lake Salt downstream; and (b) changes in water storage of Lake Salt derived from remote sensing using our developed method. There was  $0.19 \text{ km}^3$  of water gained in stage 2, which was comparable to the outflow estimate of Lake Kusai ( $0.22 \text{ km}^3$ ).

~~In stage 2 (Nov 9–Dec 31 in 2011) shown in Figure 19 (a), a temporary increase in water level occurred in Lake Kusai, implying that the overflow is not the only driving factor in stage 2. Nevertheless, stage 2 can provide water level input for Eq 17; thus the total outflow can be simulated using parameter  $C$  determined in stage 1. Since Lake Salt downstream mainly relied on the replenishment of Lake Kusai during that period, with little precipitation input and negligible glacier melt water in winter, the outflow of Lake Kusai can be comparable with the water gain in Lake Salt derived from remote sensing, though there was a small amount of evaporation loss. This relationship can provide a straightforward validation of our developed method. However, it was not available in stage 1, because the outflow of Lake Kusai first replenished Lake Haidingnuoer until the later began overflowing. The total outflow from Lake Kusai in stage 2 was calculated to be  $0.21\text{--}0.22 \text{ km}^3$ , whereas the water gain in Lake Salt was  $0.19 \text{ km}^3$ . This result showed that our densified lake water level time series from multiple optical and altimetric missions and the developed method are valuable in monitoring and predicting the outflow flood risk that is crucial for the safety of downstream residents and infrastructure.~~

## 7 Conclusion

In this study, we generated a ~~(monthly and even higher such as 10 days on average)~~ continuous 18-year data set with the mean temporal resolution from monthly to weekly of changes in lake water level and storage for 52 large lakes on the TP by combining multisource optical and altimetric information. ~~Generated from lake shoreline changes and regression analysis with altimetry data,~~ The optical water level data served as a unique reference covering the entire study period, enabling a more consistent conjunction of multisource altimetry time series. Multisource altimetry water levels were first extracted separately from spaceborne altimetry products and then combined into a longer and denser altimetry water level time series with systematic biases well removed using optical water levels as reference. The combined altimetry and optical water levels increased the overall sampling frequency to sub-monthly regardless of the lake size.

By comparison with a widely used LEGOS Hydroweb data set, we showed that without optical water levels as a reference ~~such a reference data set~~, there may be a remaining bias in the combined altimetry water levels in certain lakes. Our study has considerably improved the temporal resolution of the monitoring of TP lake water level and storage changes. For most lakes examined in the published studies, to our best knowledge, the estimates from our study provided the densest observations that can better reveal the interannual and intra-annual variability and trends in lake water level and storage, even in some relatively small TP lakes whose annual trends may, however, be incorrectly estimated by sparse sampling of lake water levels. The densified data set can also facilitate the monitoring of some rapidly expanding lakes with overflow risks and provide important information on flood prediction and early warning.

We evaluated the uncertainty in the optical water levels by field experiments and rigorous uncertainty analysis. Both methods are consistent that the magnitude of the uncertainty is around 0.1 m, which suggests that optical water levels are often more efficient and less noisy than altimetry data when the altimeter footprints on the lake surface are insufficient, especially for small lakes. Based on our estimates, 52 large TP lakes accounting for ~60% of the total TP lake area have gained  $98.3 \pm 2.1$  km<sup>3</sup> of water during the past 18 years. Lakes in the endorheic basin on the TP were mostly expanding. Water loss was more likely to be found among the southern TP lakes. In the Selin Co basin, a more complicated spatial pattern of lake storage changes was detected, as small lakes were slowly losing water whereas the large lake was gaining water, which we speculated to be caused by lake-river interactions that need further investigation. Note that the quality of the optical water levels before 2002 may not be as good as those obtained after 2002, because no altimetry data before 2002 were used in this study. Extrapolation of the lake shore change-water level relationship may not be stable if the water level during 2000–2001 was much lower or higher than those from 2002–2017. [Some discussions about how the extrapolation would affect the data quality can be found in the supplementary file.](#)

## 8 Author contribution

LD and LX designed the research. LX, LD, HQ, and ZF developed the approaches and the data set. LX, HQ, HP, and LD carried out the field experiment. LX, LD, and YW contributed to the analysis of results and writing of the paper.

## 9 Competing interests

The authors declare that they have no conflict of interests.

## 10 Acknowledgements

This study was supported by the National Nature Science Foundation of China (Grant Nos. 91547210 and 51722903). Mr. Mingda Du's assistance in the field experiments, discussion on the use of satellite altimetry data for lake monitoring with Dr. Gang Qiao from Tongji University, and efforts in improving and archiving the data set made by Dr. Daniela Ransby from PANGAEA data publisher are acknowledged here.

## References

- Benveniste, J., Baker, S., Bombaci, O., Zeli, C., Venditti, P., Zanife, O., Soussi, B., Dumont, J., Stum, J., and Milagro-Perezin, M. P.: Envisat RA-2/MWR Product Handbook, Frascati, Italy: Eur. Space Agency, 2002. 2002.
- Birkett, C. M. and Beckley, B.: Investigating the performance of the Jason-2/OSTM radar altimeter over lakes and reservoirs, Marine Geodesy, 33, 204-238, 2010.
- Bouzinac, C.: CryoSat product handbook, ESA, UCL, URL <https://earth.esa>.



- int/documents/10174/125272/CryoSat\_Product\_Handbook, 2012. 2012.
- Cheng, K.-C., Kuo, C.-Y., Tseng, H.-Z., Yi, Y., and Shum, C.: Lake surface height calibration of Jason-1 and Jason-2 over the Great Lakes, *Marine Geodesy*, 33, 186-203, 2010.
- Crétaux, J.-F., Abarca-del-Río, R., Berge-Nguyen, M., Arsen, A., Drolon, V., Clos, G., and Maisongrande, P.: Lake volume monitoring from space, *Surveys in Geophysics*, 37, 269-305, 2016.
- Crétaux, J.-F., Jelinski, W., Calmant, S., Kouraev, A., Vuglinski, V., Bergé-Nguyen, M., Gennero, M.-C., Nino, F., Del Rio, R. A., and Cazenave, A.: SOLS: A lake database to monitor in the Near Real Time water level and storage variations from remote sensing data, *Advances in space research*, 47, 1497-1507, 2011a.
- Crétaux, J., Jelinski, W., Calmant, S., Kouraev, A., Vuglinski, V., Bergé-Nguyen, M., Nino, G., Del Rio, R., Cazenave, A., and Maisongrande, P.: Hydrolare/Hydroweb: A lake database to monitor in the Near Real Time water level and storage variations from remote sensing data, *Advances in Space Research*, 47, 1497-1507, 2011b.
- Field, C. B., Barros, V. R., Dokken, D., Mach, K., Mastrandrea, M., Bilir, T., Chatterjee, M., Ebi, K., Estrada, Y., and Genova, R.: IPCC, 2014: Climate change 2014: Impacts, adaptation, and vulnerability. Part A: Global and sectoral aspects. Contribution of working group II to the fifth assessment report of the intergovernmental panel on climate change. Cambridge University Press, Cambridge, United Kingdom and New York, NY, USA, 2014.
- Frappart, F., Seyler, F., Martinez, J.-M., León, J. G., and Cazenave, A.: Floodplain water storage in the Negro River basin estimated from microwave remote sensing of inundation area and water levels, *Remote Sensing of Environment*, 99, 387-399, 2005.
- Gorelick, N., Hancher, M., Dixon, M., Ilyushchenko, S., Thau, D., and Moore, R.: Google Earth Engine: Planetary-scale geospatial analysis for everyone, *Remote Sensing of Environment*, 202, 18-27, 2017.
- Guo, J., Chang, X., Gao, Y., Sun, J., and Hwang, C.: Lake level variations monitored with satellite altimetry waveform retracking, *IEEE journal of selected topics in applied earth observations and remote sensing*, 2, 80-86, 2009.
- Huang, Q., Long, D., Du, M., Zeng, C., Qiao, G., Li, X., Hou, A., and Hong, Y.: Discharge estimation in high-mountain regions with improved methods using multisource remote sensing: A case study of the Upper Brahmaputra River, *Remote Sensing of Environment*, 219, 115-134, 2018.
- Hwang, C., Cheng, Y.-S., Yang, W.-H., Zhang, G., Huang, Y.-R., Shen, W.-B., and Pan, Y.: Lake level changes in the Tibetan Plateau from Cryosat-2, SARAL, ICESat, and Jason-2 altimeters, *Terrestrial, Atmospheric, and Oceanic sciences journal*, 30, 1-18, 2019.
- Jain, M., Andersen, O. B., Dall, J., and Stenseng, L.: Sea surface height determination in the Arctic using Cryosat-2 SAR data from primary peak empirical retrackers, *Advances in Space Research*, 55, 40-50, 2015.
- Jiang, L., Nielsen, K., Andersen, O. B., and Bauer-Gottwein, P.: Monitoring recent lake level variations on the Tibetan Plateau using CryoSat-2 SARIn mode data, *Journal of Hydrology*, 544, 109-124, 2017.
- Kittler, J. and Illingworth, J.: On threshold selection using clustering criteria, *IEEE transactions on systems, man, and cybernetics*, 1985. 652-655, 1985.
- Lehner, B. and Döll, P.: Development and validation of a global database of lakes, reservoirs and wetlands, *Journal of Hydrology*, 296, 1-22, 2004.
- Lei, Y., Yao, T., Yang, K., Sheng, Y., Kleinherenbrink, M., Yi, S., Bird, B. W., Zhang, X., Zhu, L., and Zhang, G.: Lake seasonality across the Tibetan Plateau and their varying relationship with regional mass changes and local hydrology, *Geophysical Research Letters*, 44, 892-900, 2017.
- Li, B., Zhang, J., Yu, Z., Liang, Z., Chen, L., and Acharya, K.: Climate change driven water budget dynamics of a Tibetan inland lake, *Global and Planetary Change*, 150, 70-80, 2017a.
- Li, H., Qiao, G., Wu, Y., Cao, Y., and Mi, H.: Water Level Monitoring on Tibetan Lakes Based on Icesat and Envisat Data Series, *The International Archives of Photogrammetry, Remote Sensing and Spatial Information Sciences*, 42, 1529, 2017b.
- Li, X., Long, D., Huang, Q., Han, P., Zhao, F., and Wada, Y.: A high temporal resolution lake data set from multisource altimetric missions and Landsat archives of water level and storage changes on the Tibetan Plateau during 2000-2017, <https://doi.org/10.1594/PANGAEA.898411>. PANGAEA, 2019.
- Liu, B., Lin, L. I., Yue, D. U., Liang, T., Duan, S., Hou, F., and Ren, J.: Causes of the outburst of Zonag Lake in Hoh Xil, Tibetan Plateau, and its impact on surrounding environment, *Journal of Glaciology & Geocryology*, 2016. 2016.
- Markham, B. L., Storey, J. C., Williams, D. L., and Irons, J. R.: Landsat sensor performance: history and current status, *IEEE Transactions on Geoscience and Remote Sensing*, 42, 2691-2694, 2004.



- McFeeters, S. K.: The use of the Normalized Difference Water Index (NDWI) in the delineation of open water features, *International journal of remote sensing*, 17, 1425-1432, 1996.
- Messenger, M. L., Lehner, B., Grill, G., Nedeva, I., and Schmitt, O.: Estimating the volume and age of water stored in global lakes using a geo-statistical approach, *Nature communications*, 7, 13603, 2016.
- 5 Neckel, N., Kropáček, J., Bolch, T., and Hochschild, V.: Glacier mass changes on the Tibetan Plateau 2003–2009 derived from ICESat laser altimetry measurements, *Environmental Research Letters*, 9, 014009, 2014.
- Nielsen, K., Stenseng, L., Andersen, O. B., and Knudsen, P.: The performance and potentials of the CryoSat-2 SAR and SARIn modes for lake level estimation, *Water*, 9, 374, 2017.
- 10 Otsu, N.: A threshold selection method from gray-level histograms, *IEEE transactions on systems, man, and cybernetics*, 9, 62-66, 1979.
- Pekel, J.-F., Cottam, A., Gorelick, N., and Belward, A. S.: High-resolution mapping of global surface water and its long-term changes, *Nature*, 540, 418, 2016.
- Sandberg Sørensen, L., Simonsen, S. B., Nielsen, K., Lucas-Picher, P., Spada, G., Adalgeirsdottir, G., Forsberg, R., and Hvidberg, C.: Mass balance of the Greenland ice sheet (2003–2008) from ICESat data—the impact of interpolation, sampling and firn density, *The Cryosphere*, 5, 173-186, 2011.
- 15 Song, C., Huang, B., and Ke, L.: Modeling and analysis of lake water storage changes on the Tibetan Plateau using multi-mission satellite data, *Remote Sensing of Environment*, 135, 25-35, 2013.
- Strahler, A. N.: Hypsometric (area-altitude) analysis of erosional topography, *Geological Society of America Bulletin*, 63, 1117-1142, 1952.
- 20 Team, P.: Planet Application Program Interface: In Space for Life on Earth, San Francisco, CA, 2017. 2017.
- Wan, W., Long, D., Hong, Y., Ma, Y., Yuan, Y., Xiao, P., Duan, H., Han, Z., and Gu, X.: A lake data set for the Tibetan Plateau from the 1960s, 2005, and 2014, *Scientific data*, 3, 160039, 2016.
- Wang, J., Song, C., Reager, J. T., Yao, F., Famiglietti, J. S., Sheng, Y., MacDonald, G. M., Brun, F., Schmied, H. M., and Marston, R. A.: Recent global decline in endorheic basin water storages, *Nature geoscience*, 11, 926, 2018.
- 25 Willgoose, G. and Hancock, G.: Revisiting the hypsometric curve as an indicator of form and process in transport-limited catchment, *Earth Surface Processes and Landforms: The Journal of the British Geomorphological Group*, 23, 611-623, 1998.
- Xiaojun, Y., Shiyin, L., and Meiping, S.: Changes of Kusai Lake in Hoh Xil region and causes of its water overflowing, *Acta Geographica Sinica*, 67, 689-698, 2012.
- Xu, H.: A study on information extraction of water body with the modified normalized difference water index (MNDWI), *JOURNAL OF REMOTE SENSING-BEIJING-*, 9, 595, 2005.
- 30 Yao, F., Wang, J., Yang, K., Wang, C., Walter, B. A., and Crétaux, J.-F.: High resolution data set of annual lake areas and water storage across the Inner Tibet, 2002-2015. In: Supplement to: Yao, F et al. (2018): Lake storage variation on the endorheic Tibetan Plateau and its attribution to climate change since the new millennium. *Environmental Research Letters*, 13(6), 064011, <https://doi.org/10.1088/1748-9326/aab5d3>, PANGAEA, 2018a.
- 35 Yao, F., Wang, J., Yang, K., Wang, C., Walter, B. A., and Crétaux, J.-F.: Lake storage variation on the endorheic Tibetan Plateau and its attribution to climate change since the new millennium, *Environmental Research Letters*, 13, 064011, 2018b.
- Yu, S., Liu, J., Xu, J., and Wang, H.: Evaporation and energy balance estimates over a large inland lake in the Tibet-Himalaya, *Environmental Earth Sciences*, 64, 1169-1176, 2011.
- Zhang, G., Xie, H., Kang, S., Yi, D., and Ackley, S. F.: Monitoring lake level changes on the Tibetan Plateau using ICESat altimetry data (2003–2009), *Remote Sensing of Environment*, 115, 1733-1742, 2011.
- 40 Zhang, G., Yao, T., Shum, C., Yi, S., Yang, K., Xie, H., Feng, W., Bolch, T., Wang, L., and Behrangi, A.: Lake volume and groundwater storage variations in Tibetan Plateau's endorheic basin, *Geophysical Research Letters*, 44, 5550-5560, 2017a.
- Zhang, G., Zheng, G., Gao, Y., Xiang, Y., Lei, Y., and Li, J.: Automated water classification in the Tibetan plateau using Chinese GF-1 WFV data, *Photogrammetric Engineering & Remote Sensing*, 83, 509-519, 2017b.
- 45 Zhang, Y., Liu, C., Tang, Y., and Yang, Y.: Trends in pan evaporation and reference and actual evapotranspiration across the Tibetan Plateau. *J Geophys Res* 112:D12110, *Journal of Geophysical Research Atmospheres*, 112, -, 2007.
- Zhou, J., Wang, L., Zhang, Y., Guo, Y., Li, X., and Liu, W.: Exploring the water storage changes in the largest lake (Selin Co) over the Tibetan Plateau during 2003–2012 from a basin-wide hydrological modeling, *Water Resources Research*, 51, 8060-8086, 2015.
